# Supplementary material for: Design and synthesis of pyrazole/isoxazole linked arylcinnamides as tubulin polymerization inhibitors and potential antiproliferative agents
Source: Royal Society of Chemistry journal article supplement (doi:10.1039/c5ob01257k), 2015-01-01

## Supporting Information

### Design and Synthesis of Pyrazole/Isoxazole linked Arylcinnamides as Tubulin Polymerization Inhibitors and Potential Antiproliferative Agents

Ahmed Kamal,<sup>\*a,b</sup> Anver Basha Shaik,<sup>a</sup> Bala Bhaskara Rao,<sup>c</sup> Irfan Khan,<sup>a</sup> G. Bharath Kumar,<sup>a</sup> Nishant Jain<sup>c</sup>

<sup>a</sup>*Medicinal Chemistry and Pharmacology, CSIR - Indian Institute of Chemical Technology, Hyderabad 500007, India*

<sup>b</sup>*Catalytic Chemistry Research Chair, Chemistry Department, College of Science, King Saud University, Riyadh 11451, Saudi Arabia*

<sup>c</sup>*Centre for Chemical Biology, CSIR - Indian Institute of Chemical Technology, Hyderabad 500007, India*

---

*Correspondence:* <sup>\*1,2</sup>Corresponding authors. Tel.: +91-40-27193157; fax: +91-40-27193189, e-mail: [ahmedkamal@iict.res.in](mailto:ahmedkamal@iict.res.in) (A. Kamal).

**<sup>1</sup>H NMR, and <sup>13</sup>C NMR spectra of conjugate 15a:**

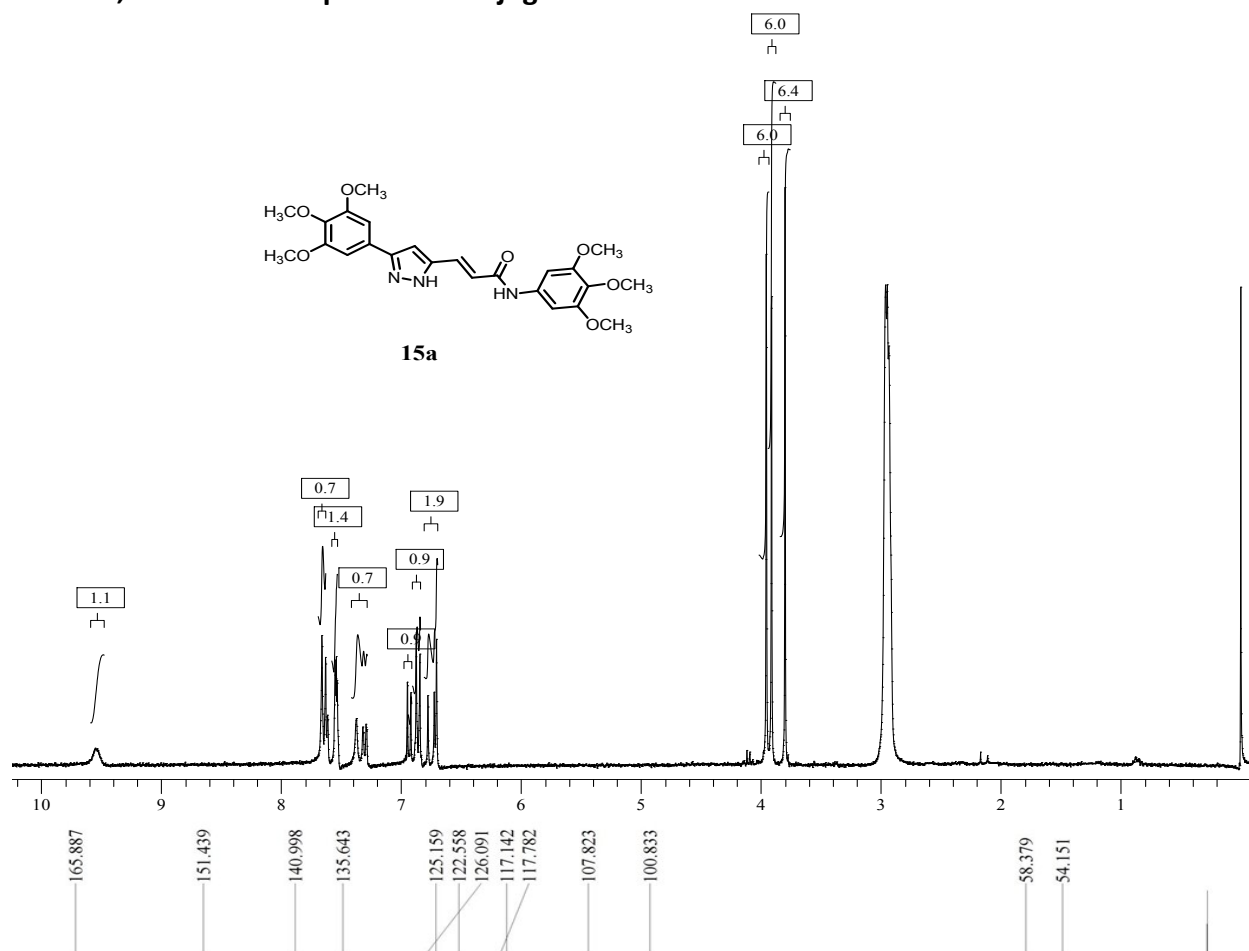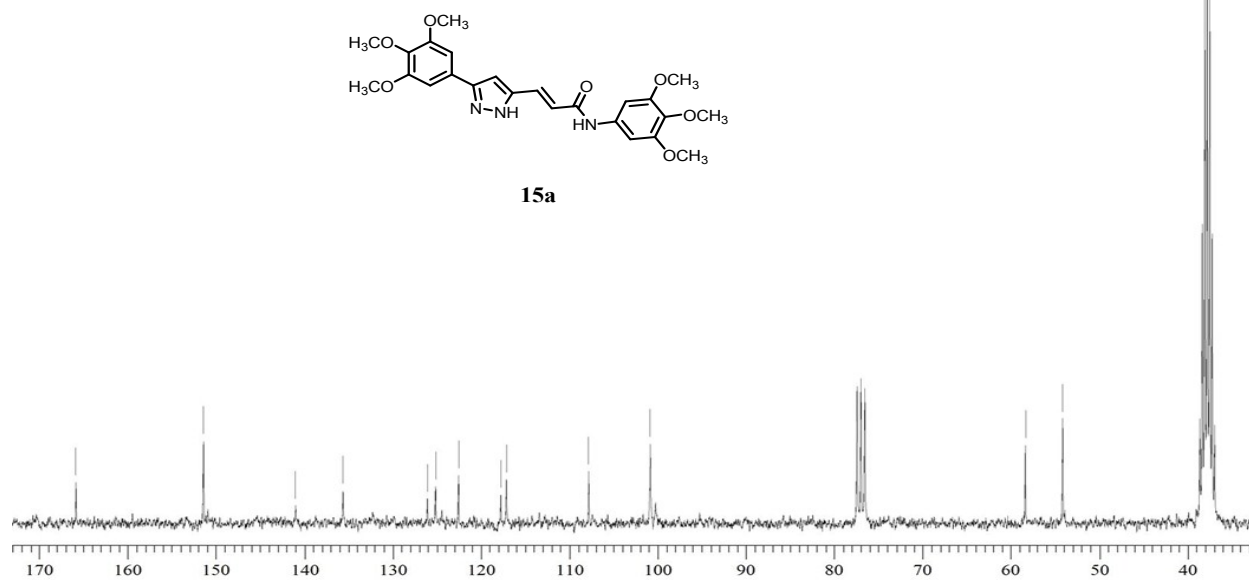

**<sup>1</sup>H NMR and <sup>13</sup>C NMR spectra of conjugate 15b:**

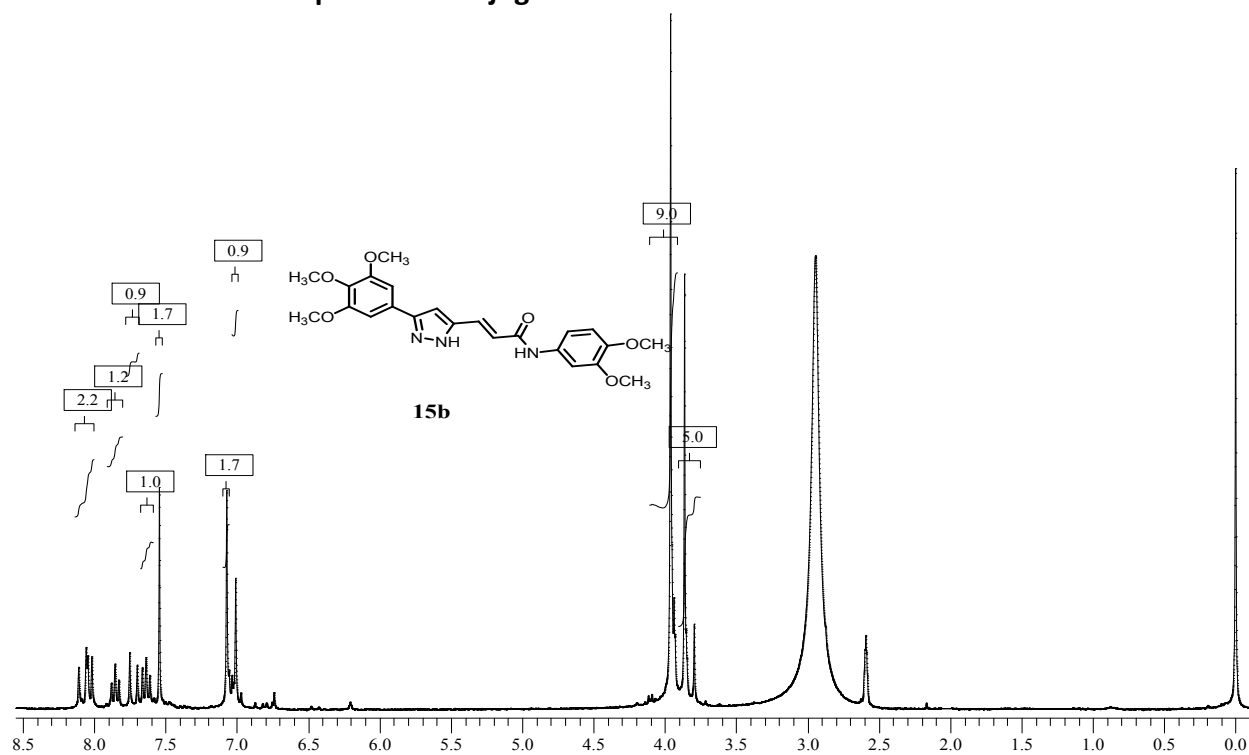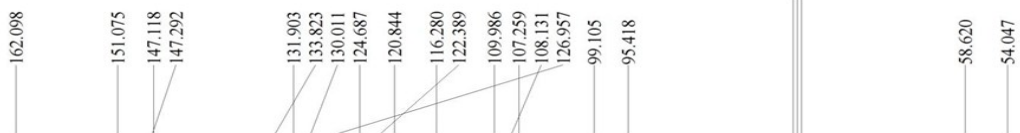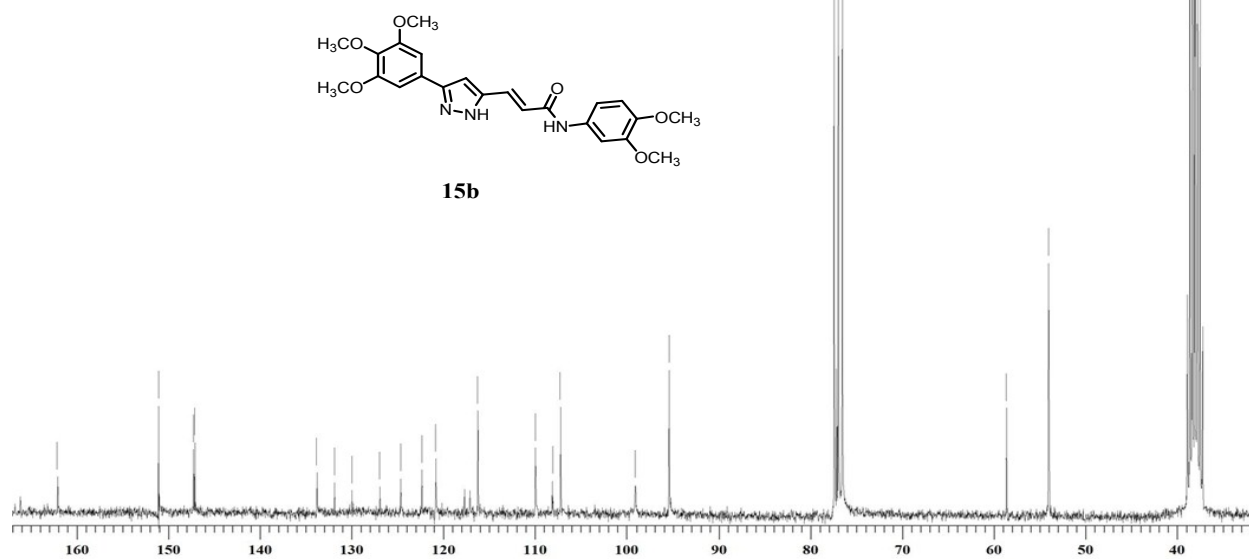

**<sup>1</sup>H NMR and <sup>13</sup>C NMR spectra of conjugate 15c:**

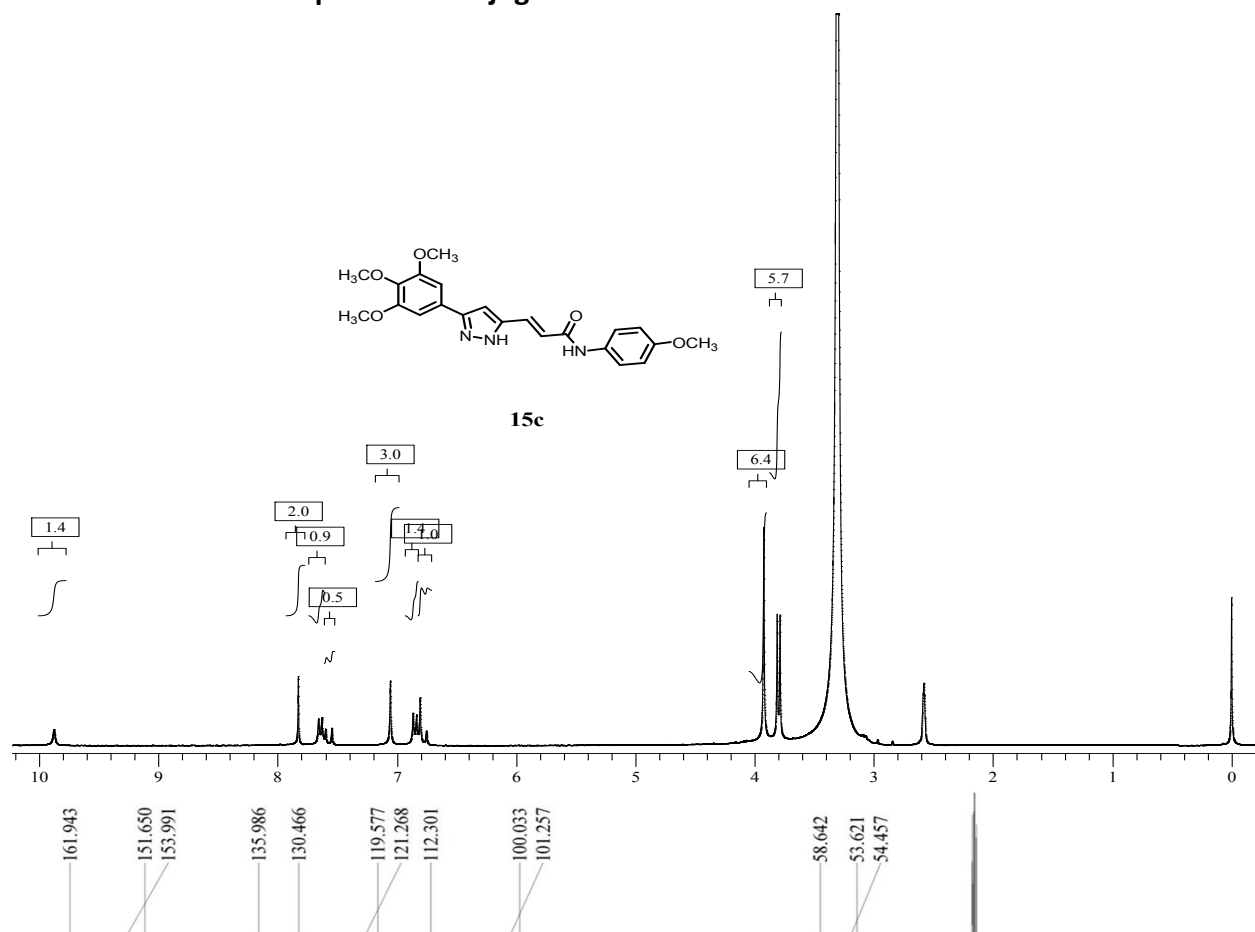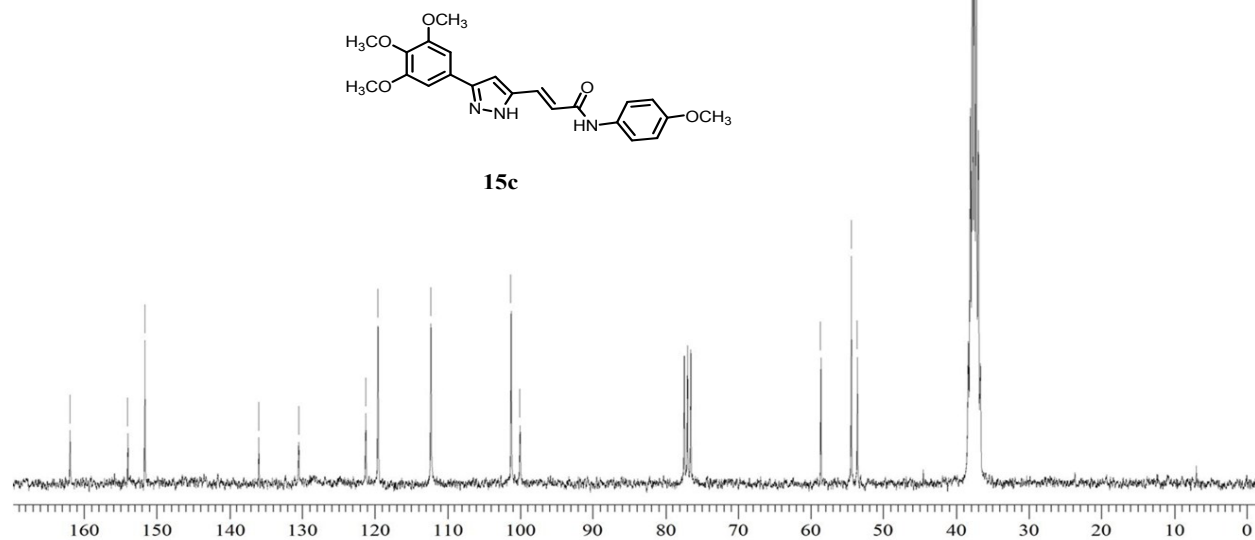

**<sup>1</sup>H NMR and <sup>13</sup>C NMR spectra of conjugate 15d:**

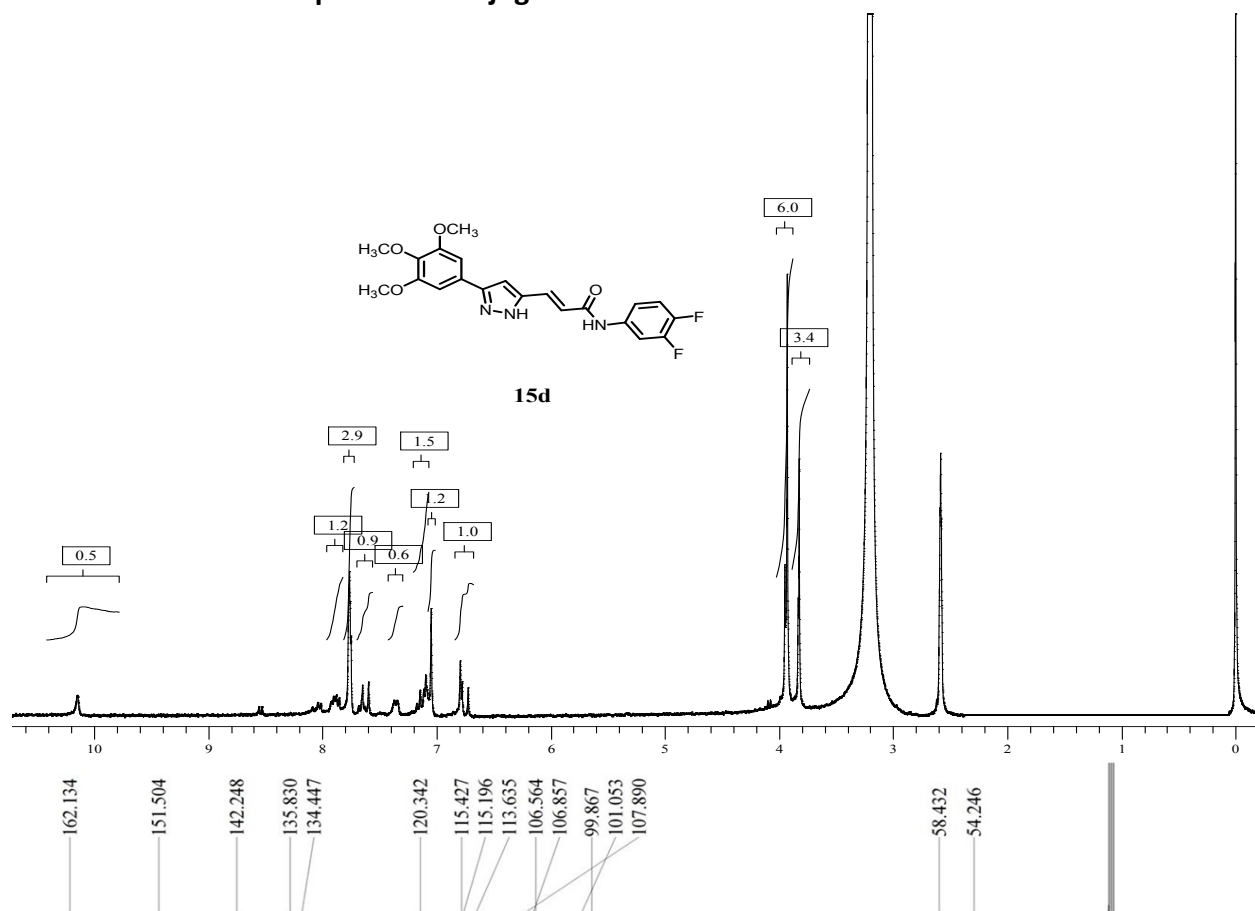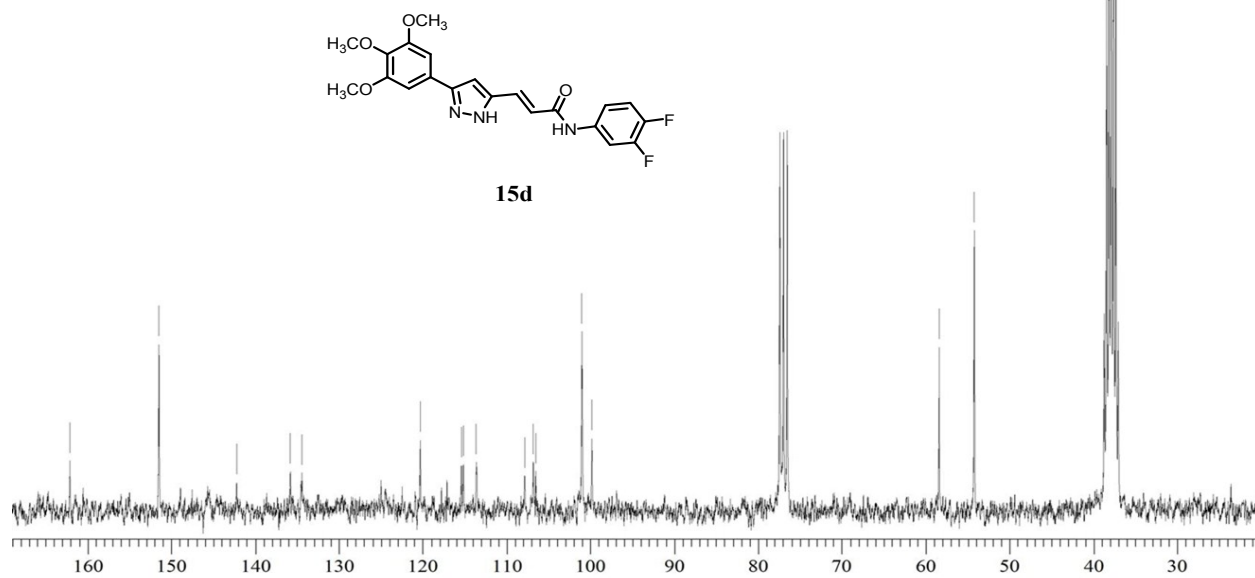

**<sup>1</sup>H NMR and <sup>13</sup>C NMR spectra of conjugate 15e:**

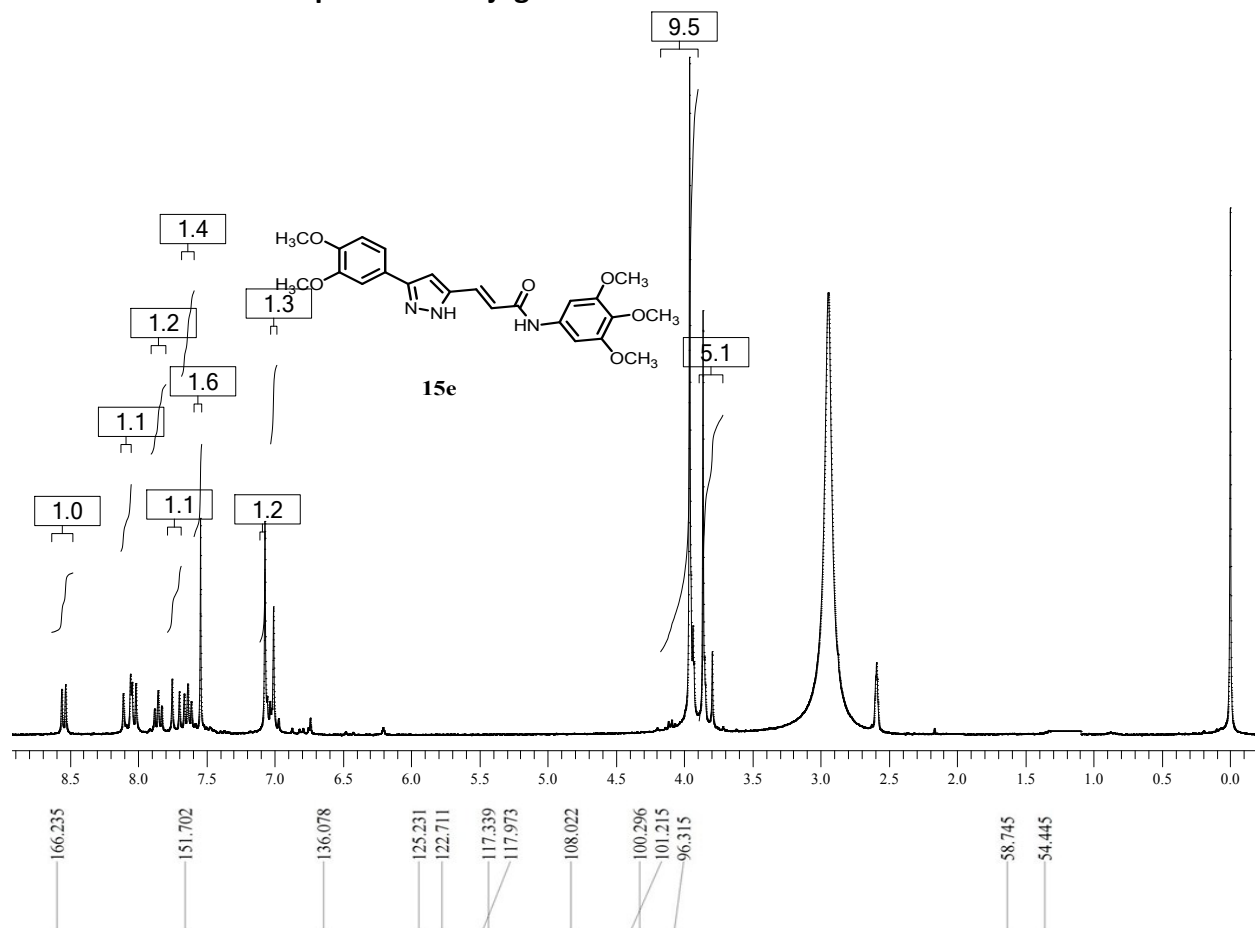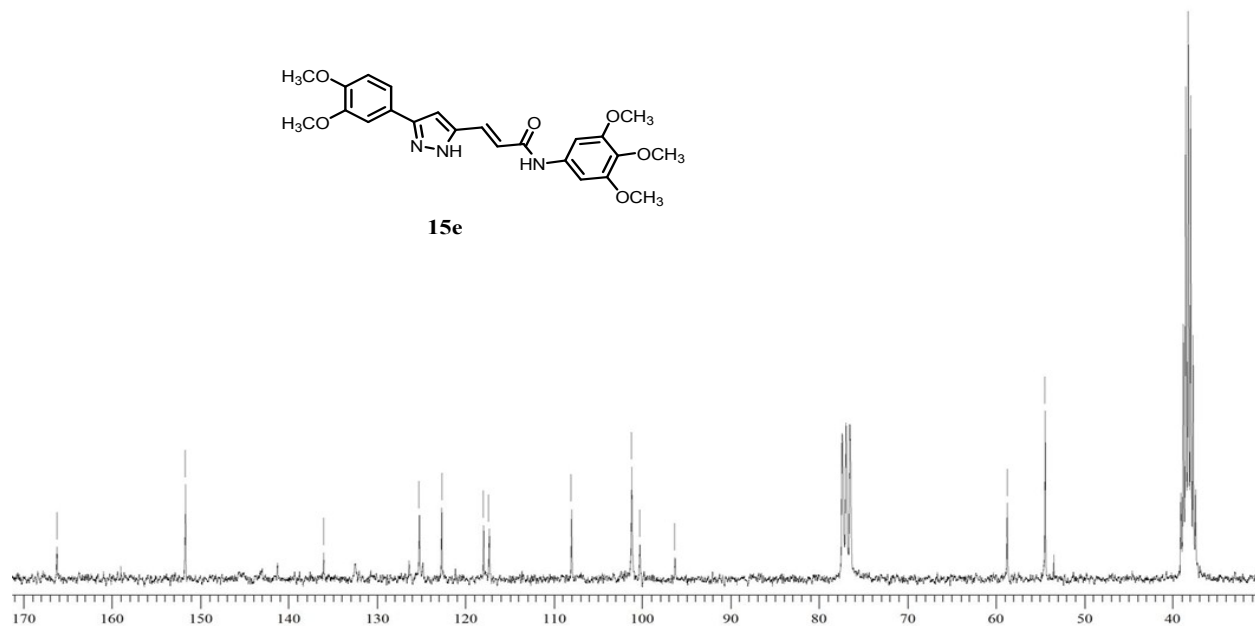

**<sup>1</sup>H NMR and <sup>13</sup>C NMR spectra of conjugate 15f:**

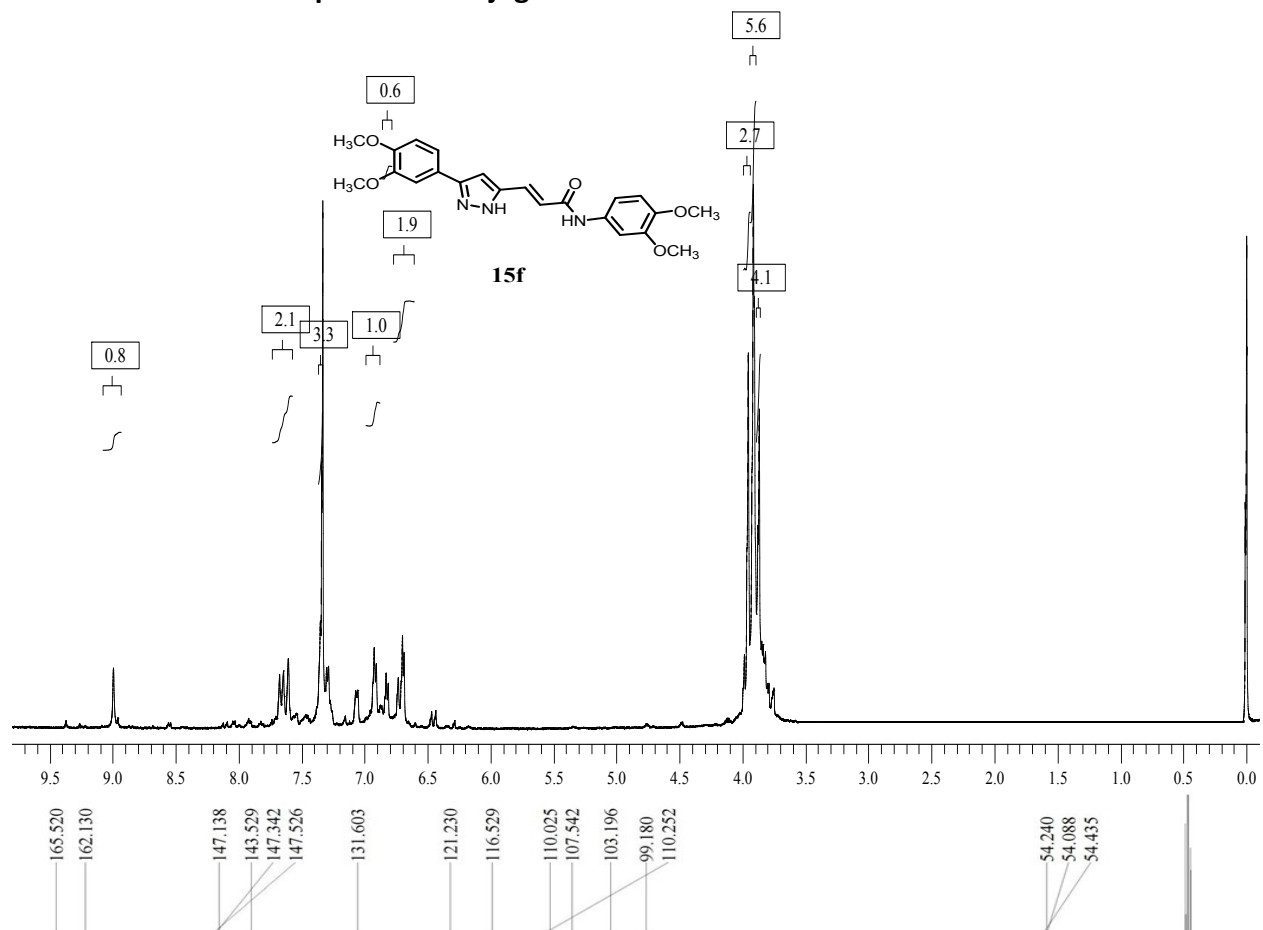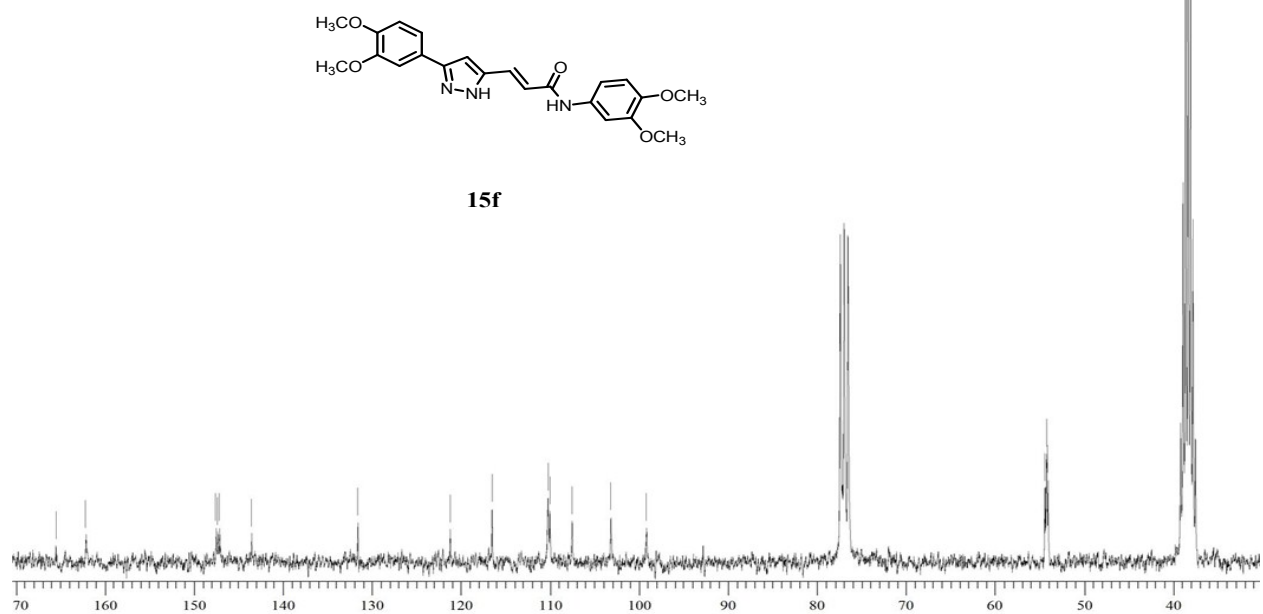

**<sup>1</sup>H NMR and <sup>13</sup>C NMR spectra of conjugate 15g:**

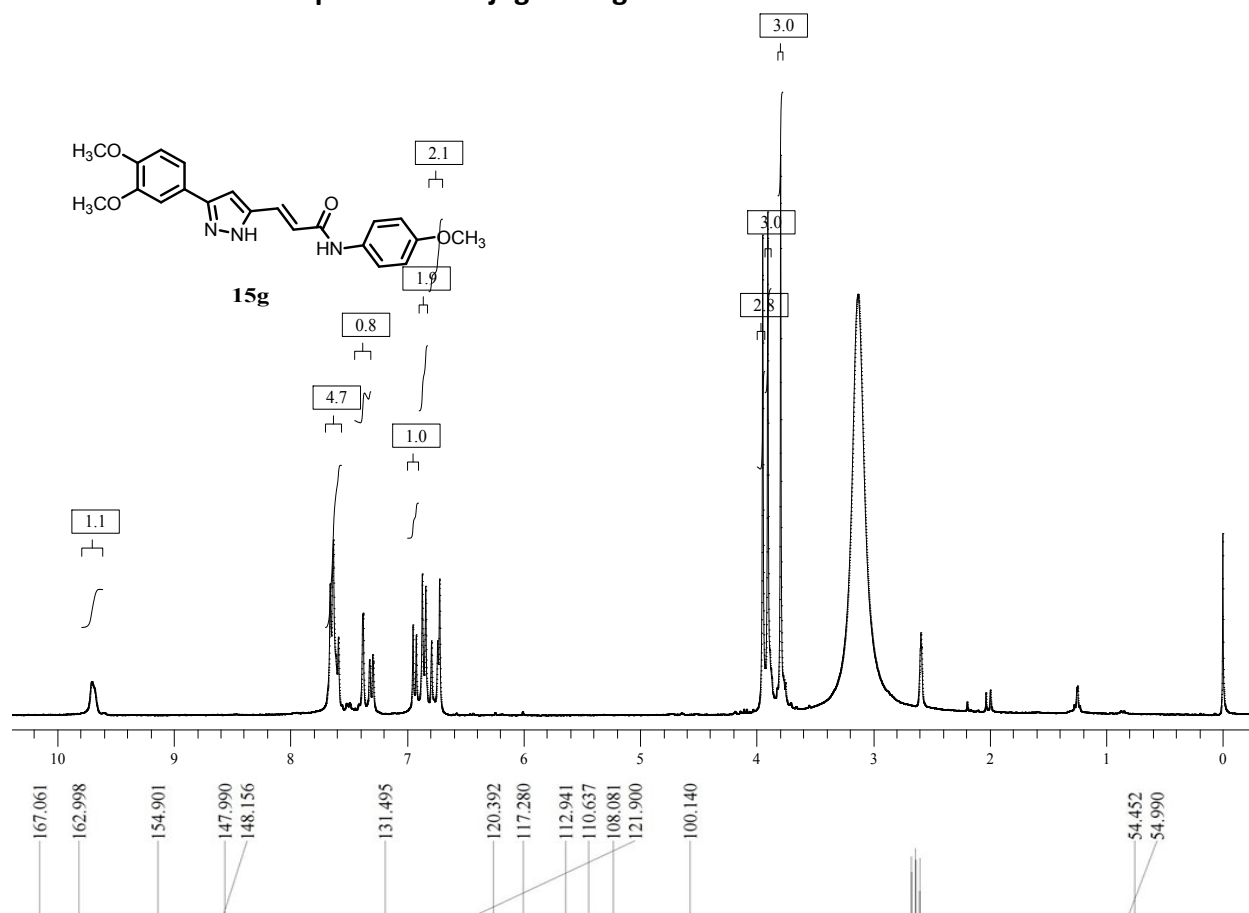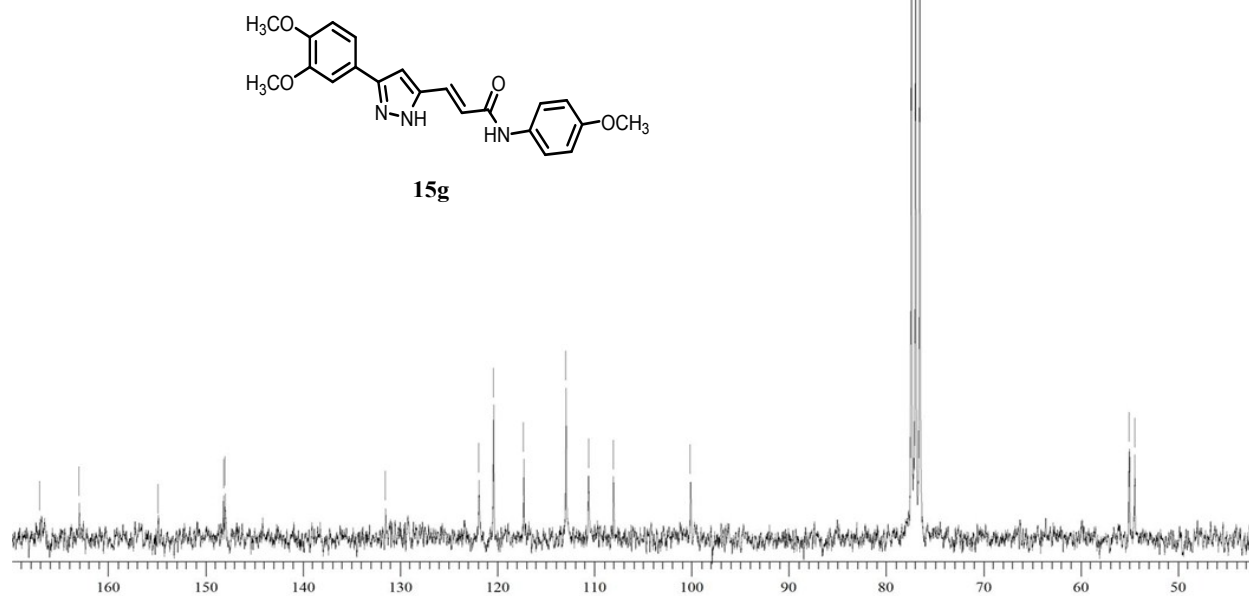



**<sup>1</sup>H NMR and spectrum of conjugate 15h:**

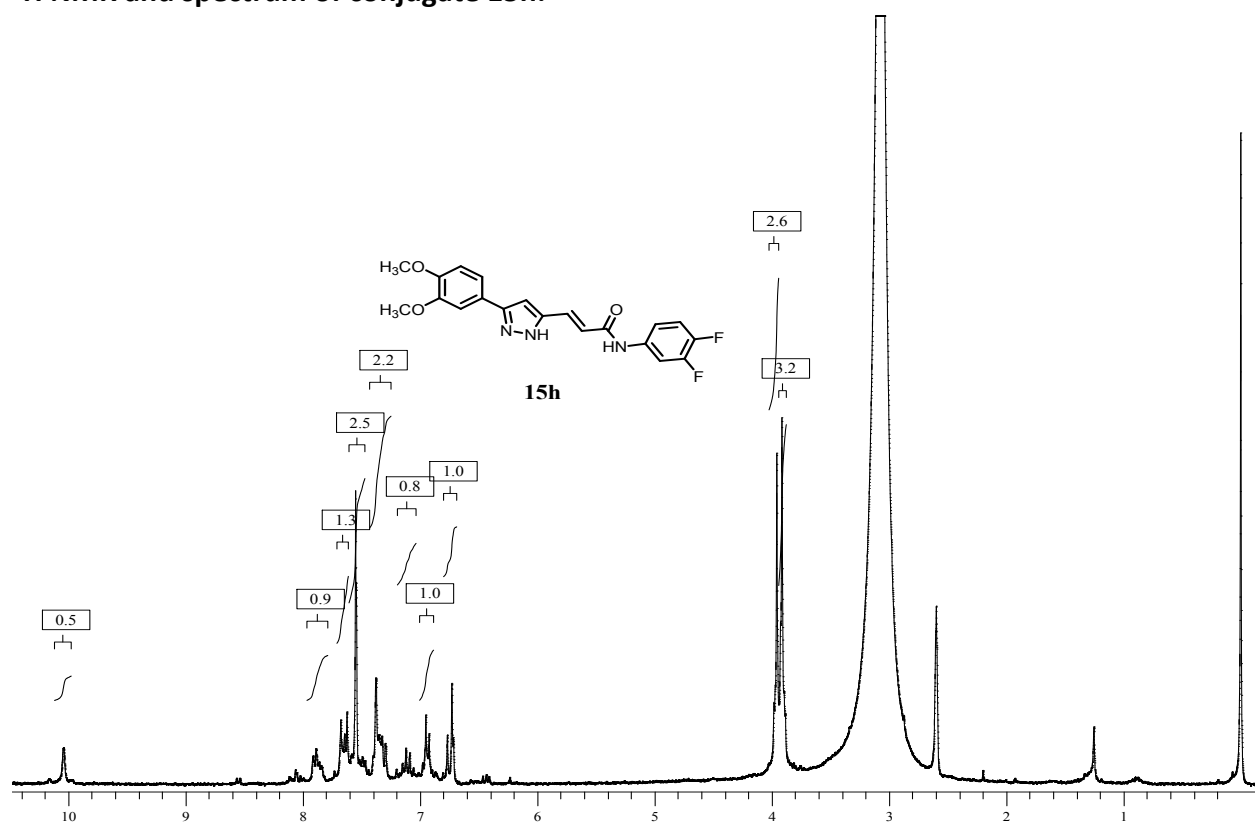

**<sup>1</sup>H NMR and <sup>13</sup>C NMR spectra of conjugate 15i:**

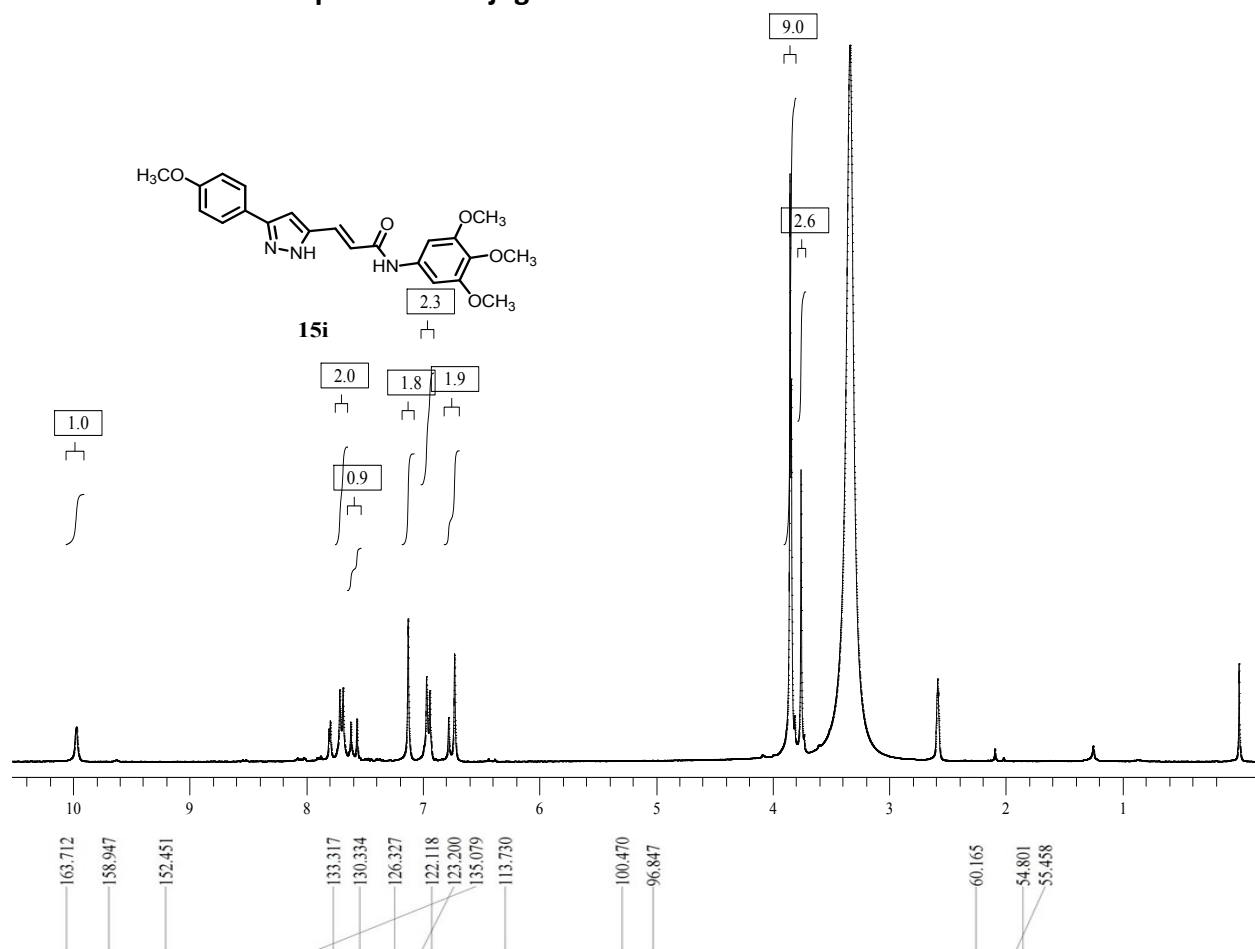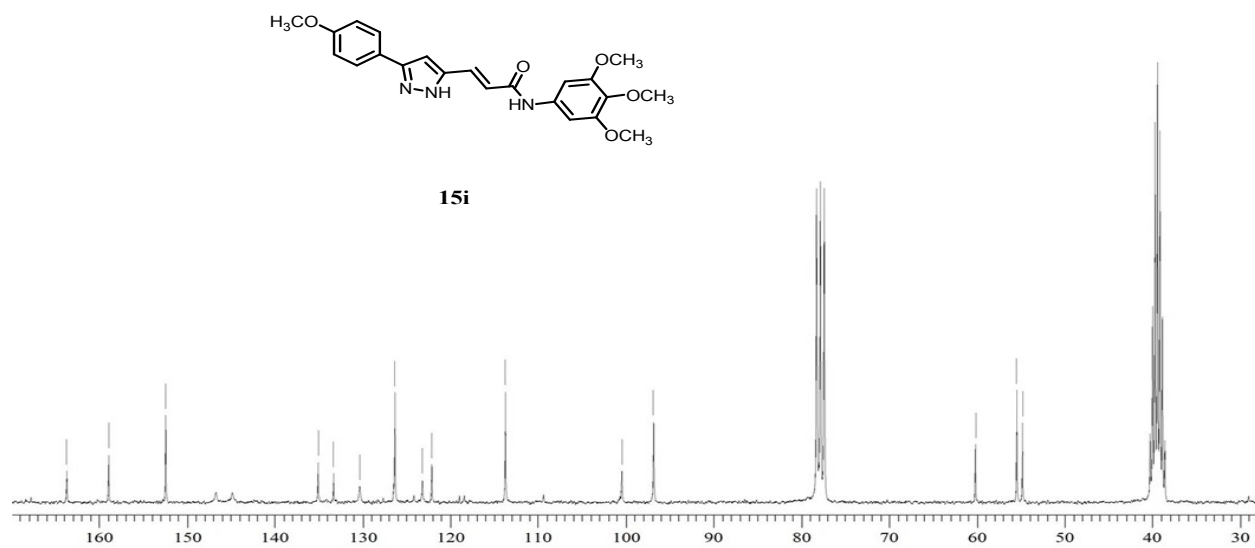

**<sup>1</sup>H NMR spectrum of conjugate 15j:**

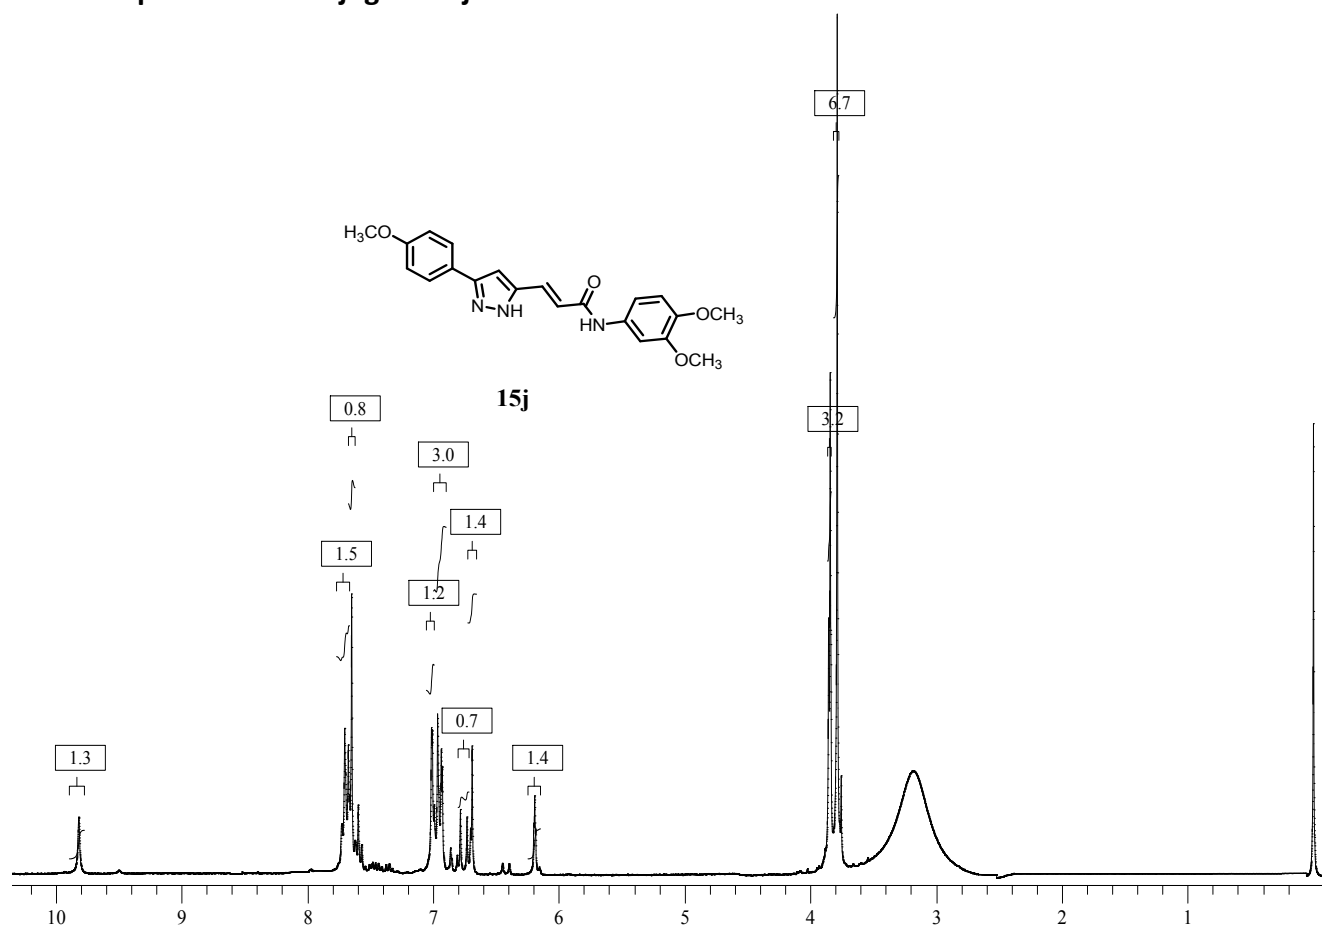

**<sup>1</sup>H NMR and <sup>13</sup>C NMR spectra of conjugate 15k:**

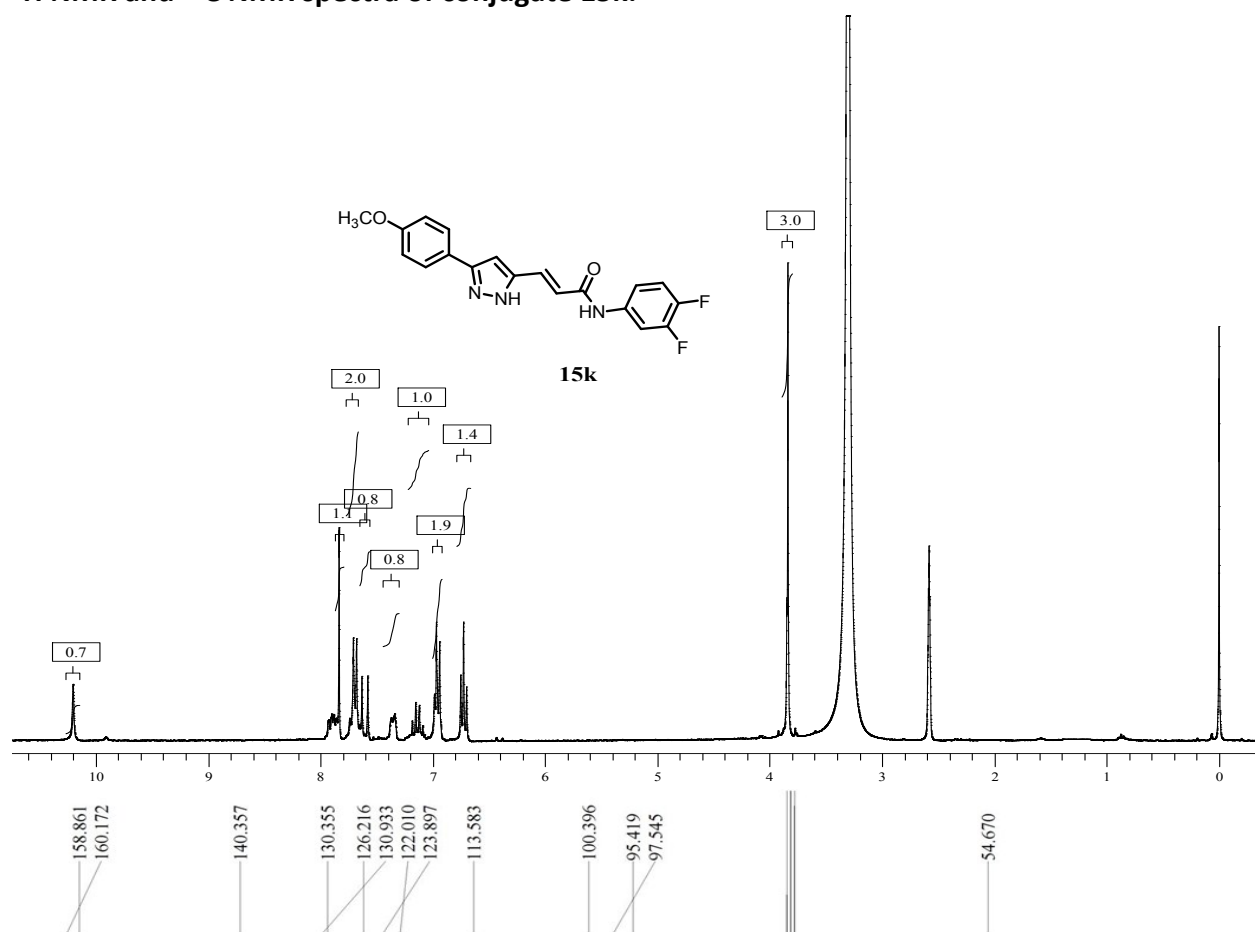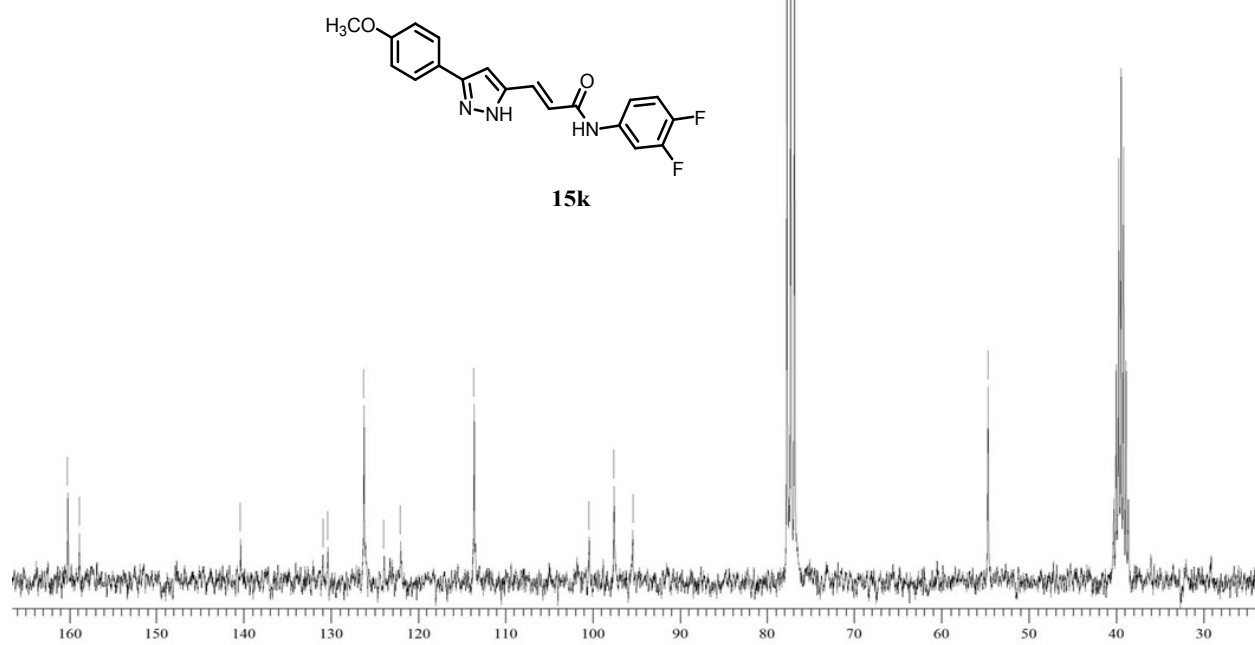

**<sup>1</sup>H NMR Spectrum of conjugate 15I:**

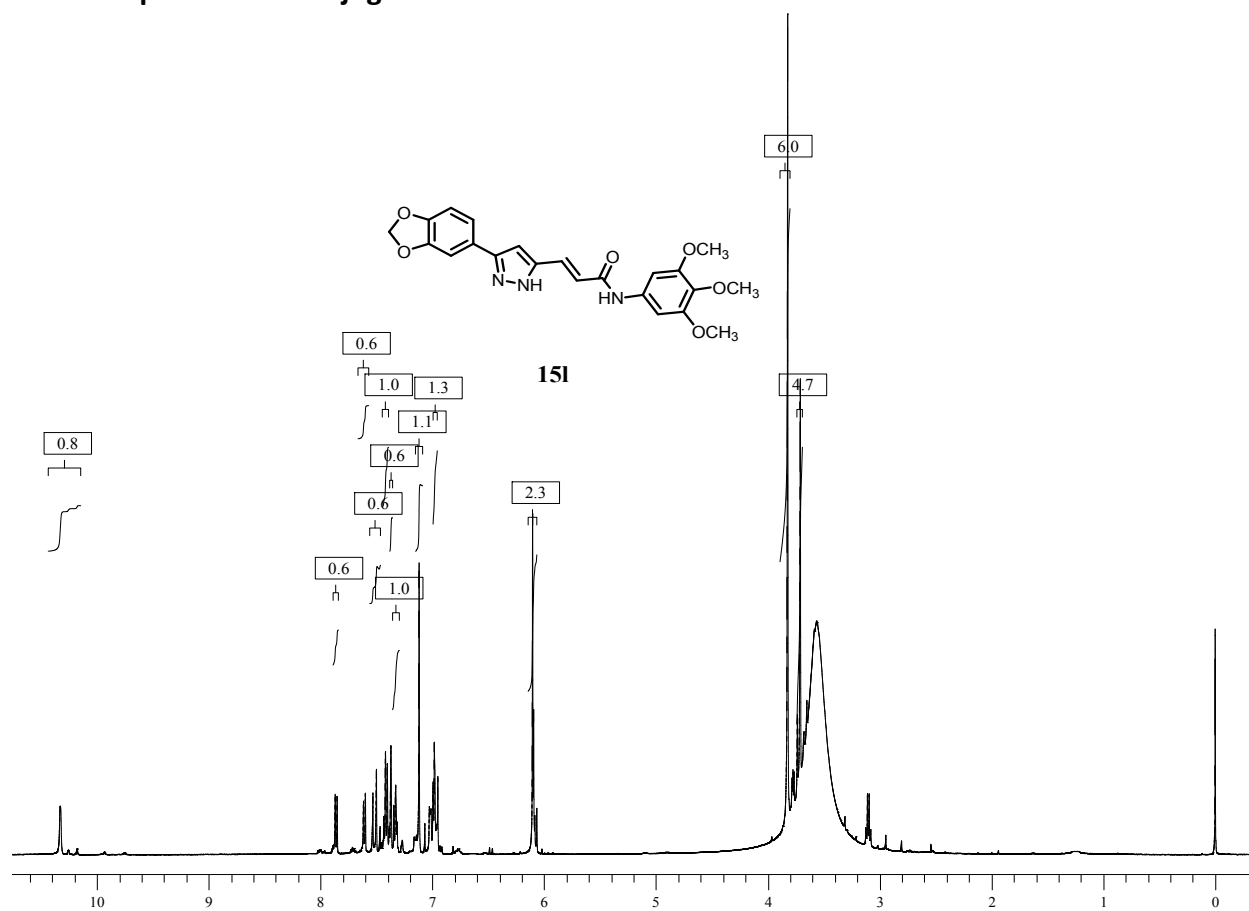

**$^1\text{H}$  NMR and  $^{13}\text{C}$  NMR spectra of conjugate 15m:**

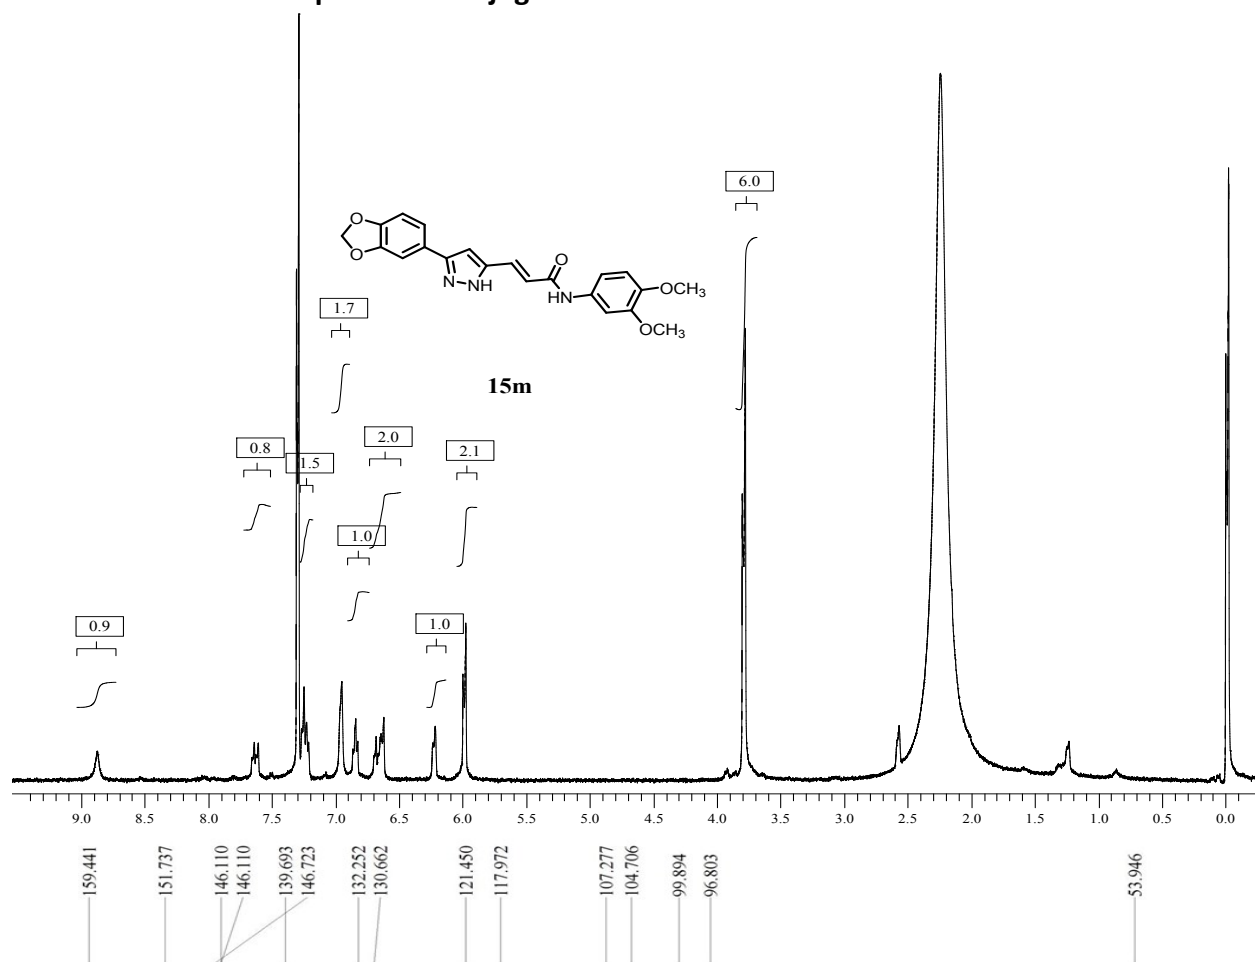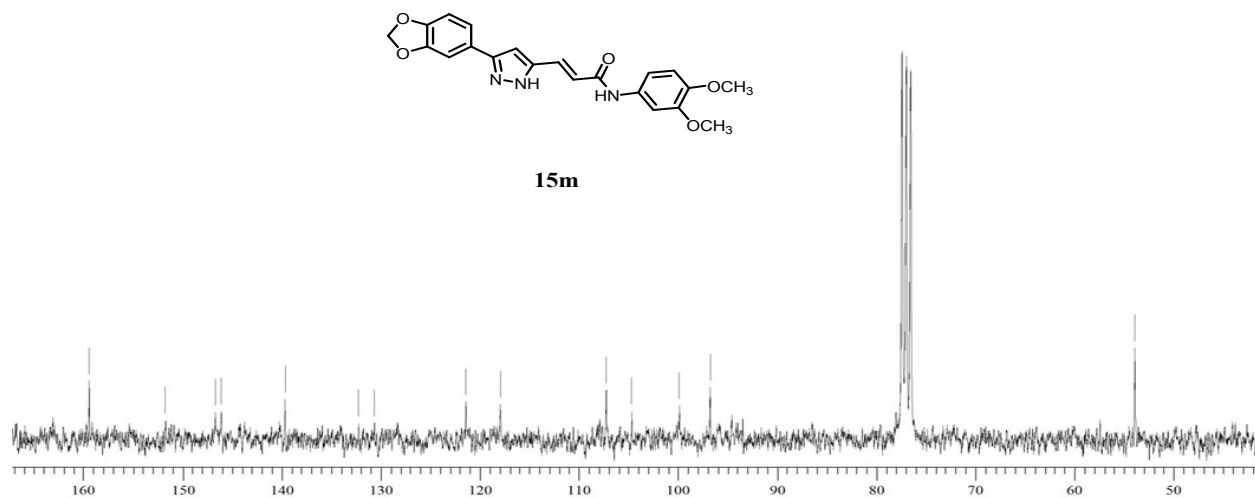

**<sup>1</sup>H NMR and <sup>13</sup>C NMR spectra of conjugate 15n:**

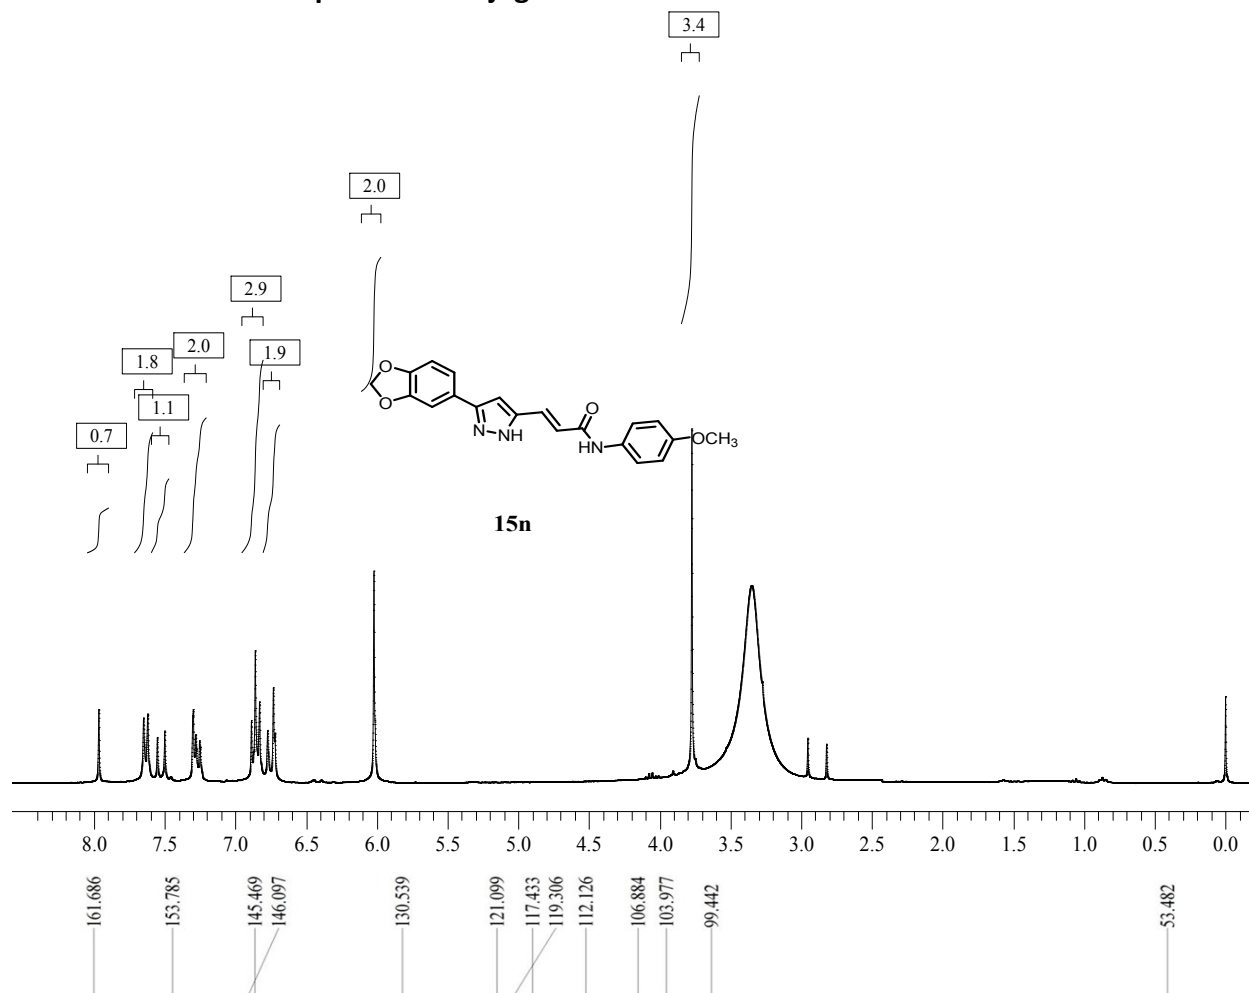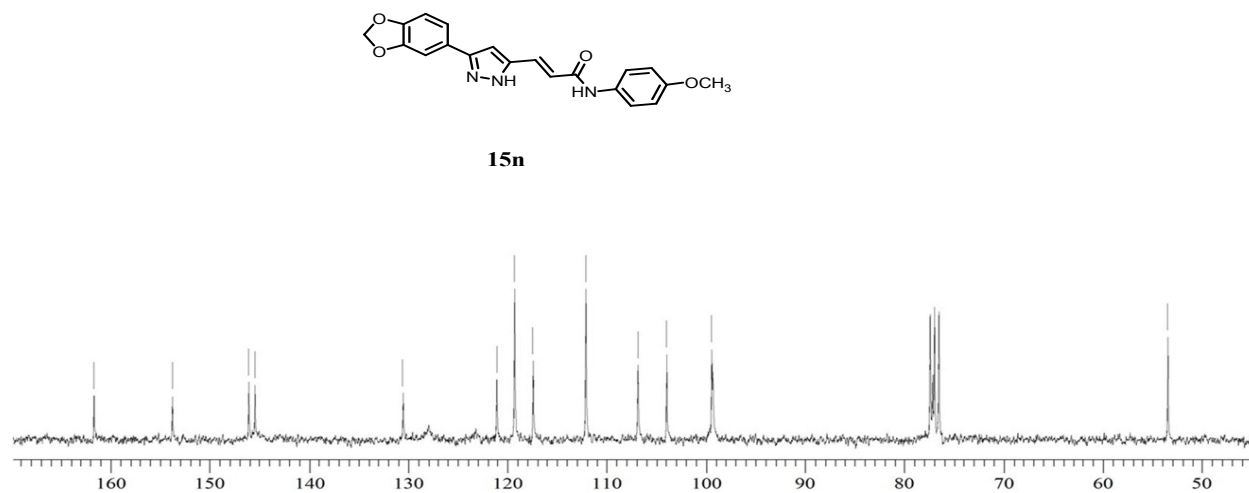

**<sup>1</sup>H NMR and <sup>13</sup>C NMR spectra of conjugate 15o:**

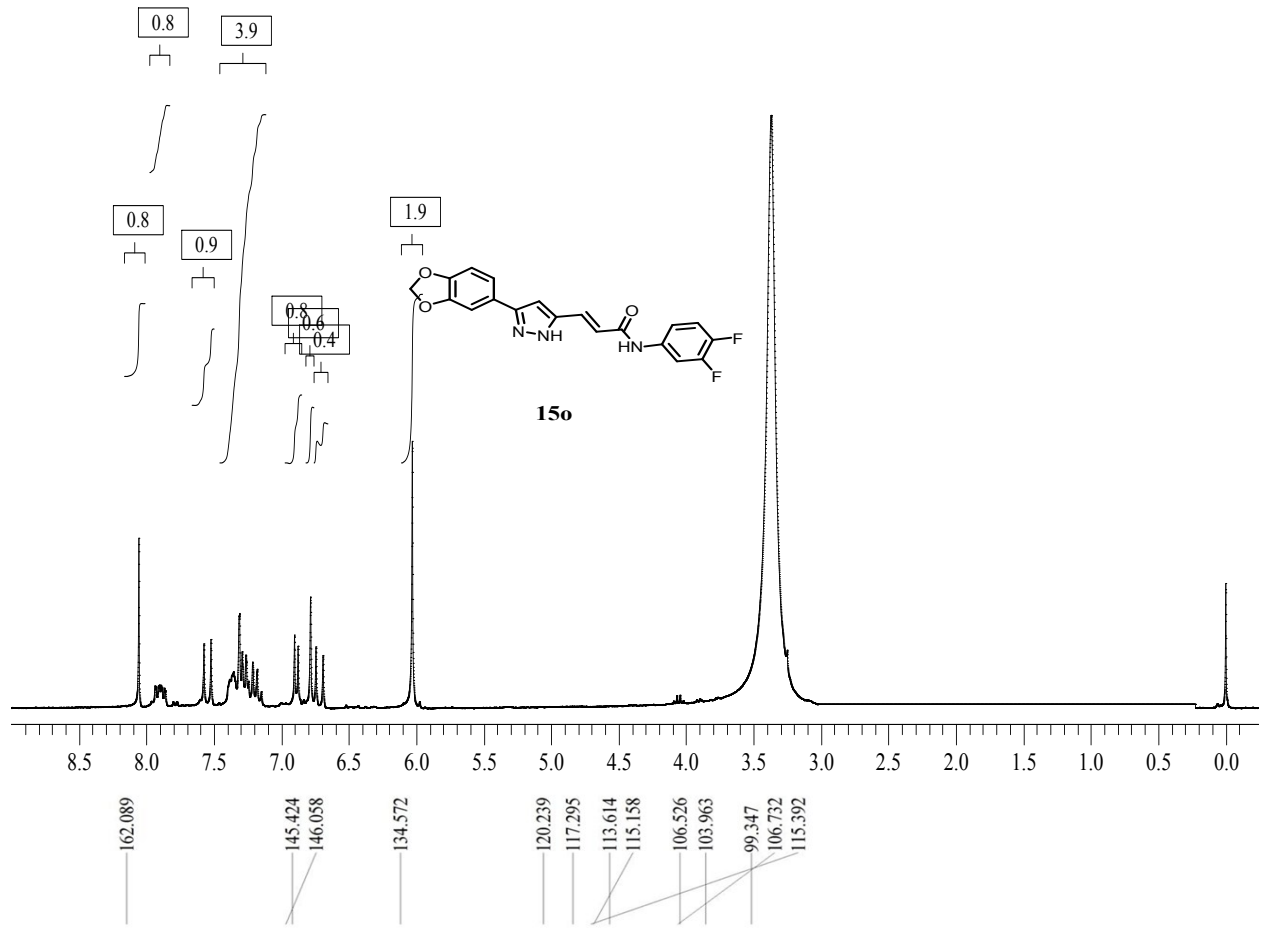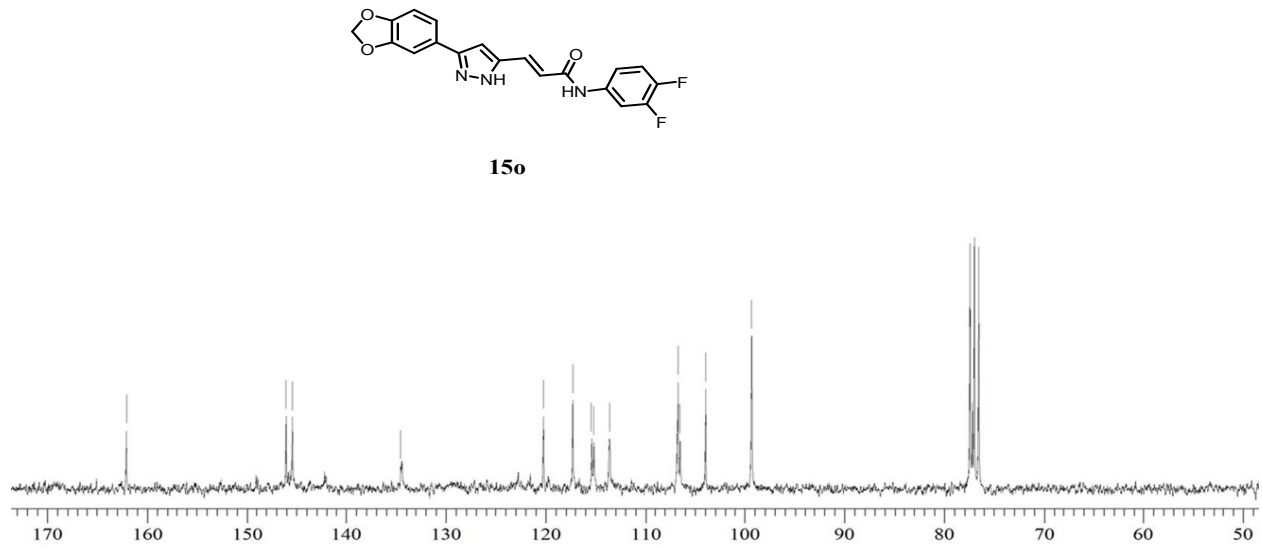



**<sup>1</sup>H NMR and <sup>13</sup>C NMR spectra of conjugate 21a:**

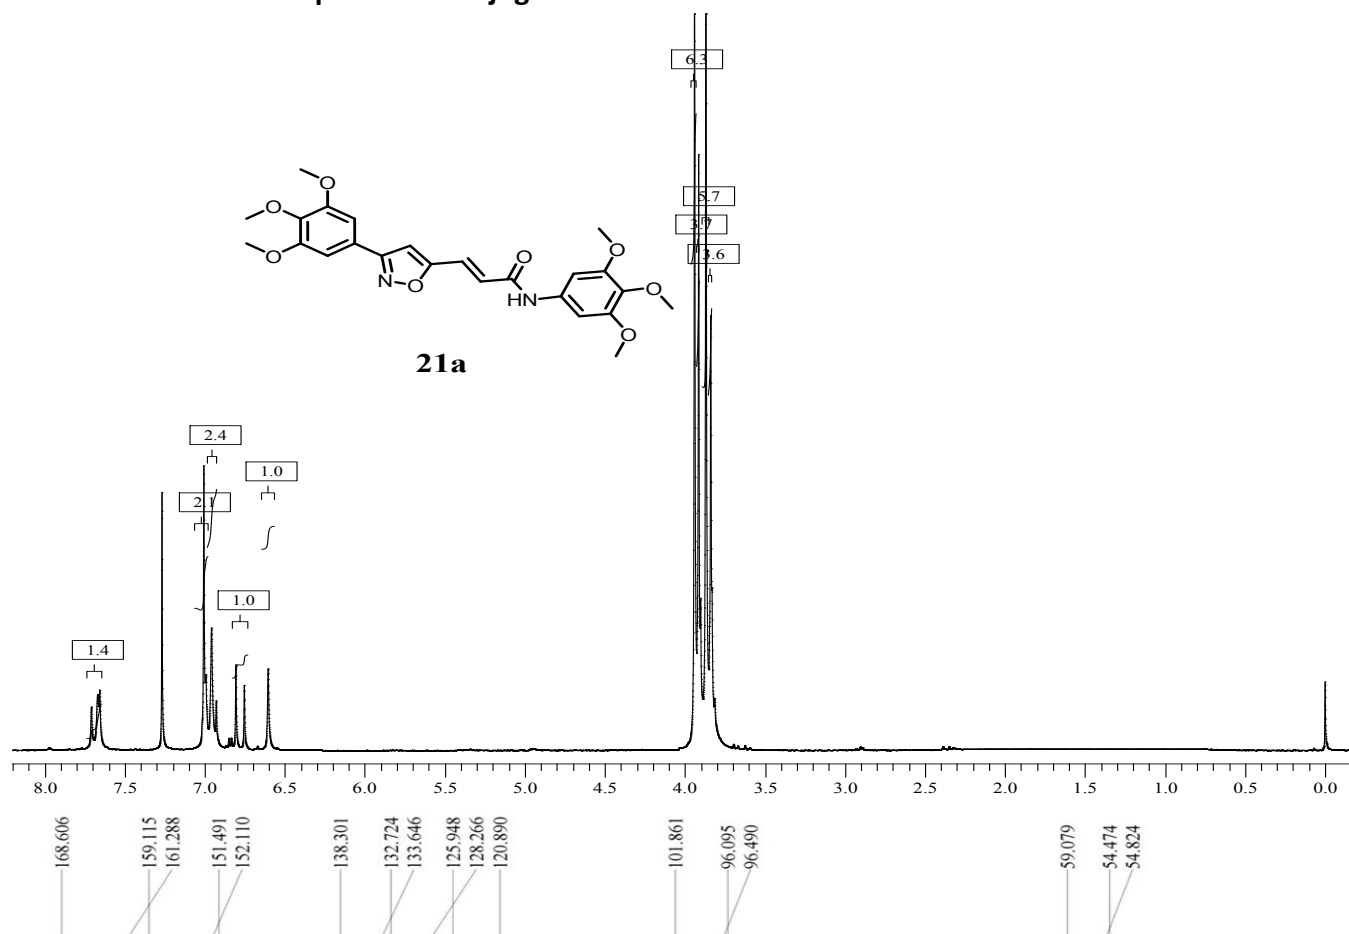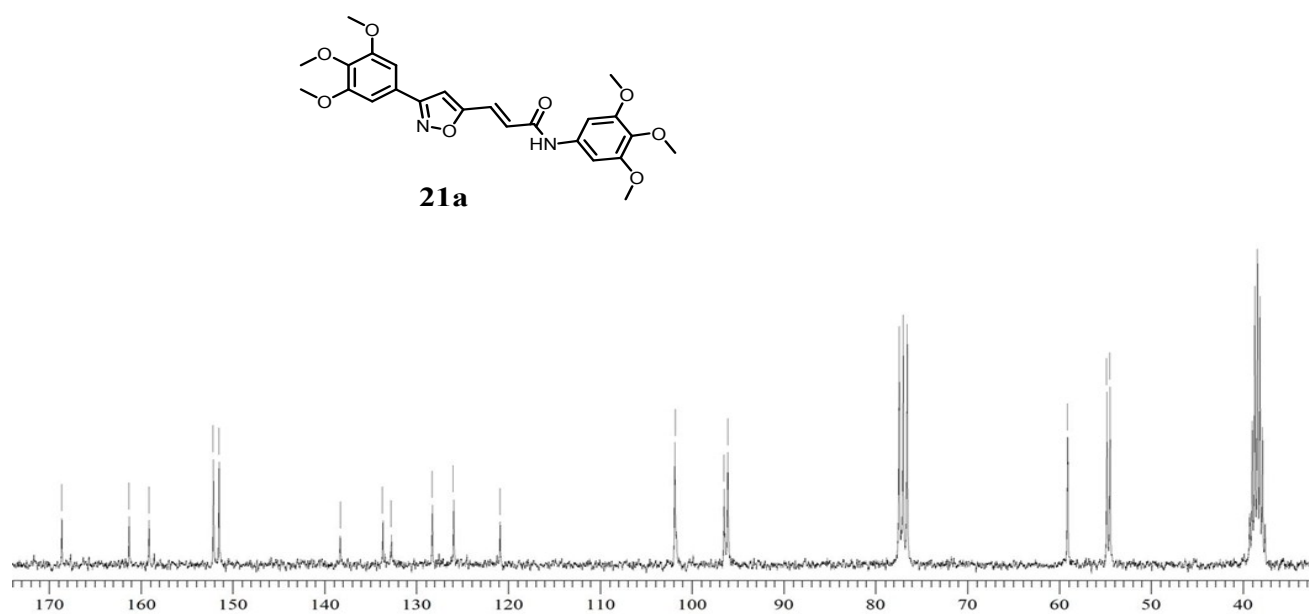

**<sup>1</sup>H NMR Spectrum of conjugate 21b:**

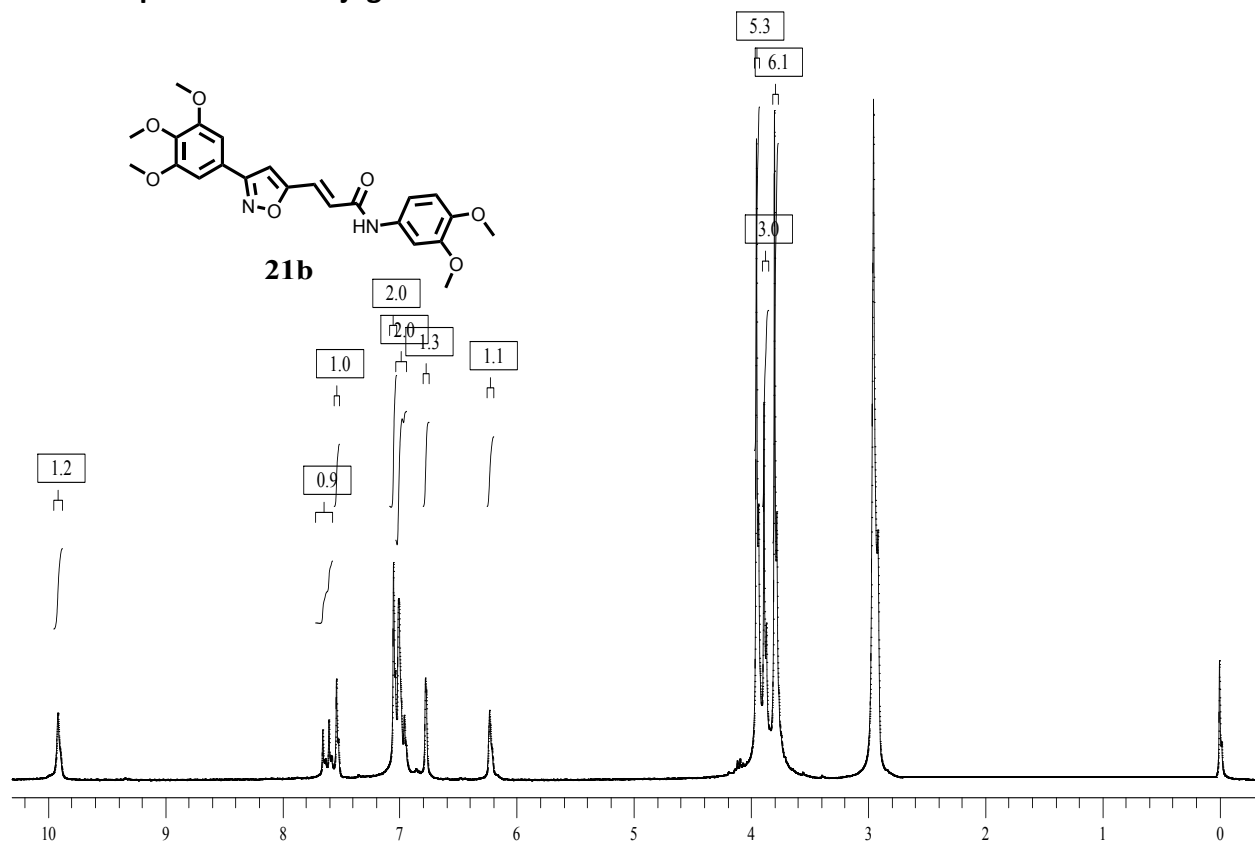

**<sup>1</sup>H NMR and <sup>13</sup>C NMR spectra of conjugate 21c:**

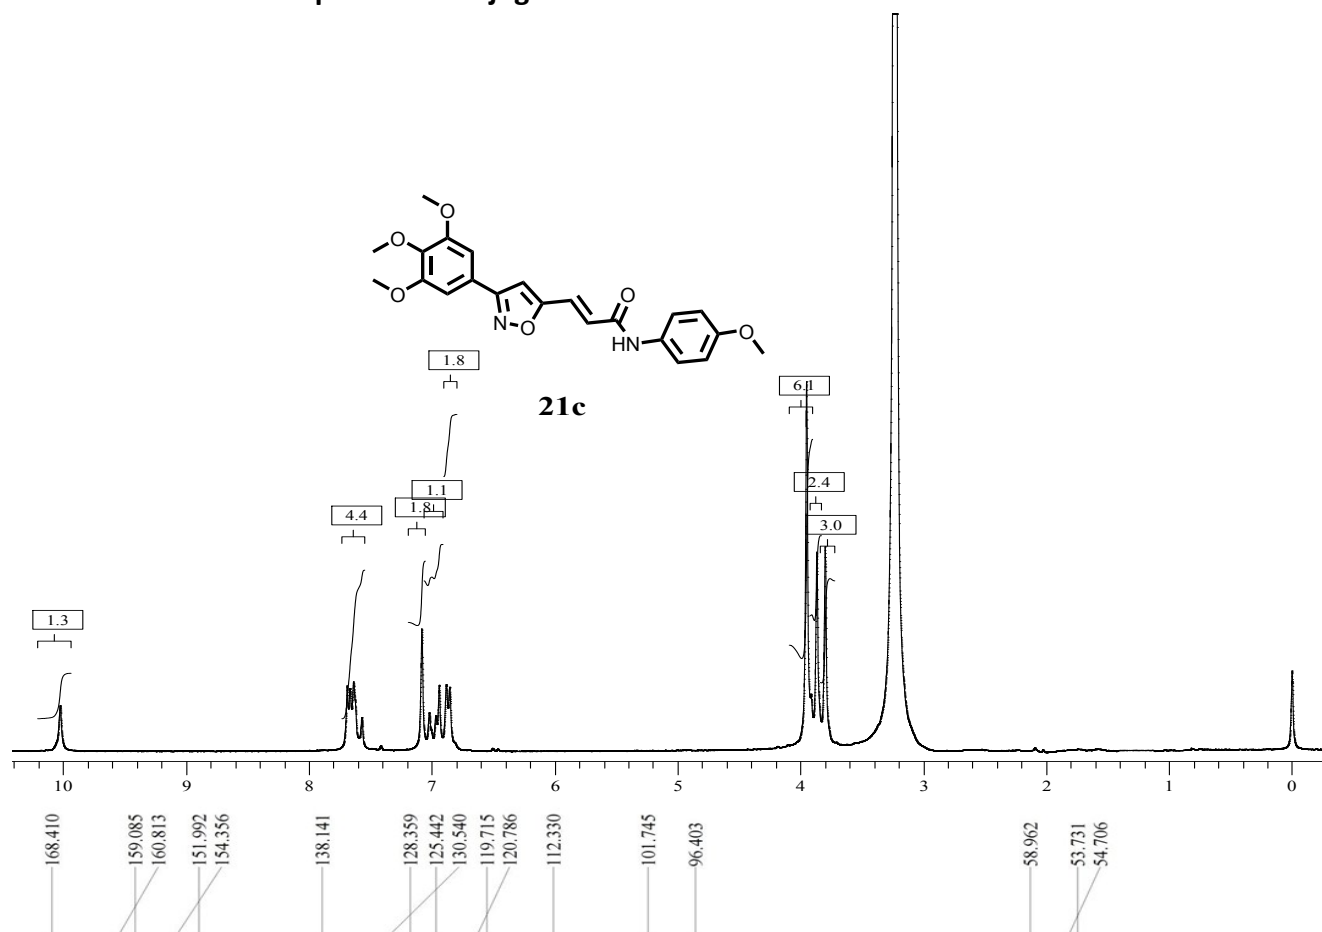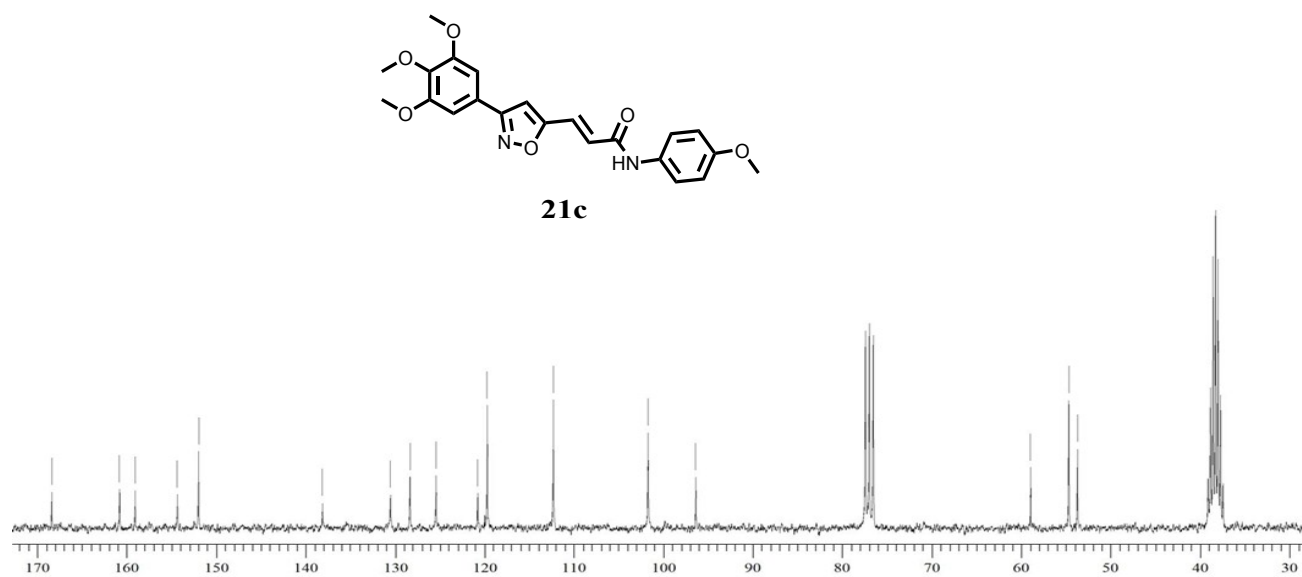

**<sup>1</sup>H NMR and <sup>13</sup>C NMR spectra of conjugate 21d:**

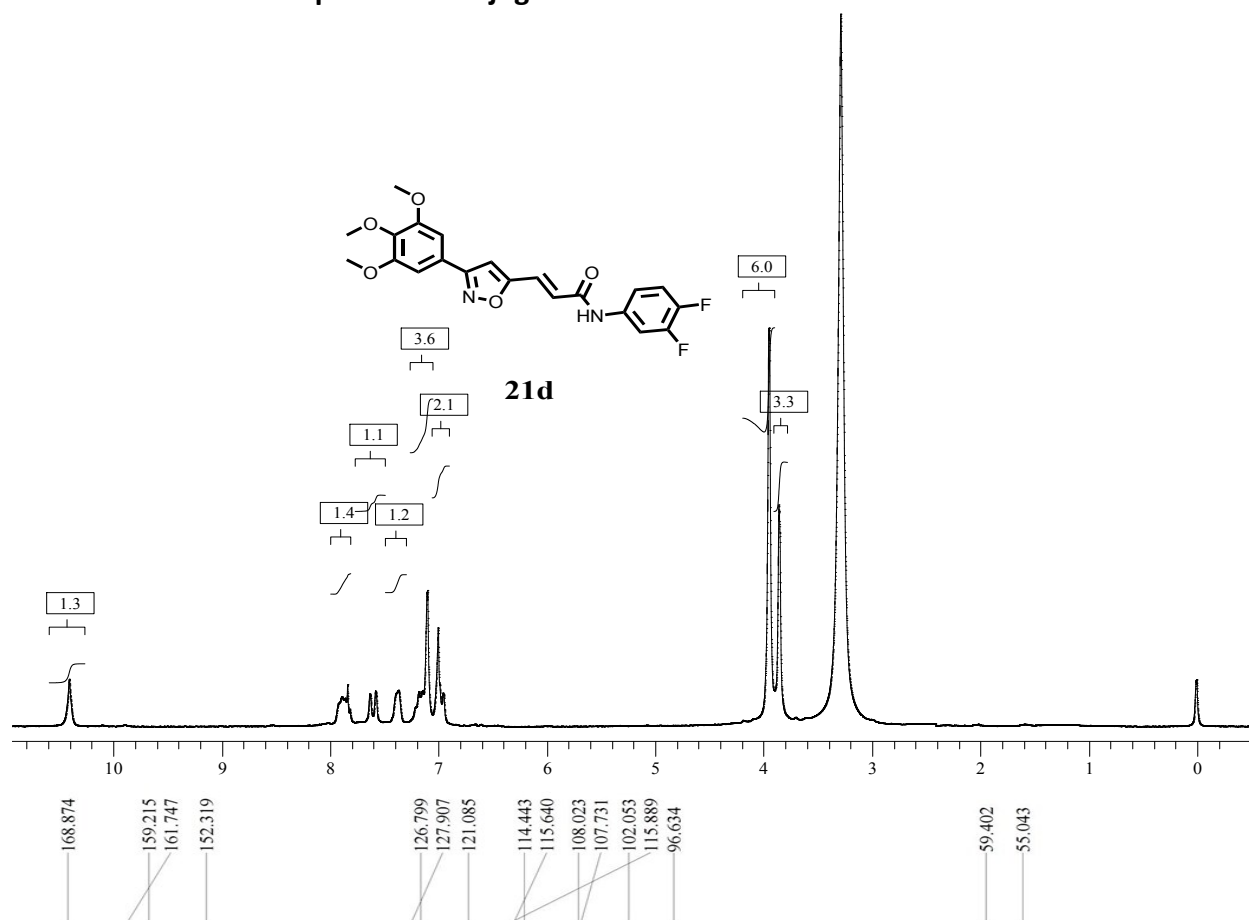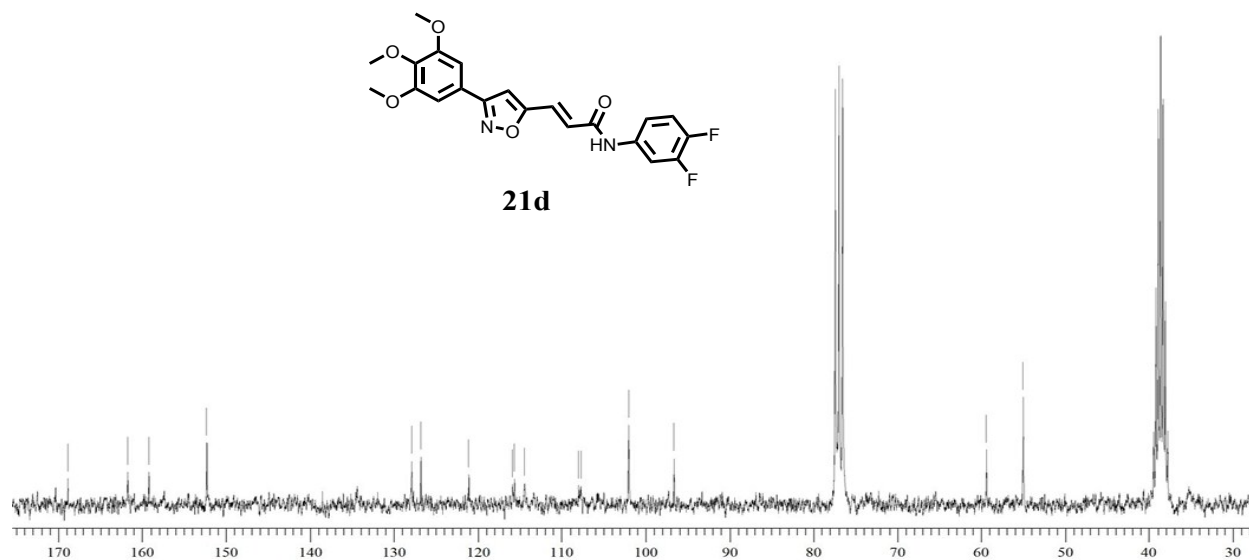

**<sup>1</sup>H NMR and <sup>13</sup>C NMR spectra of conjugate 21e:**

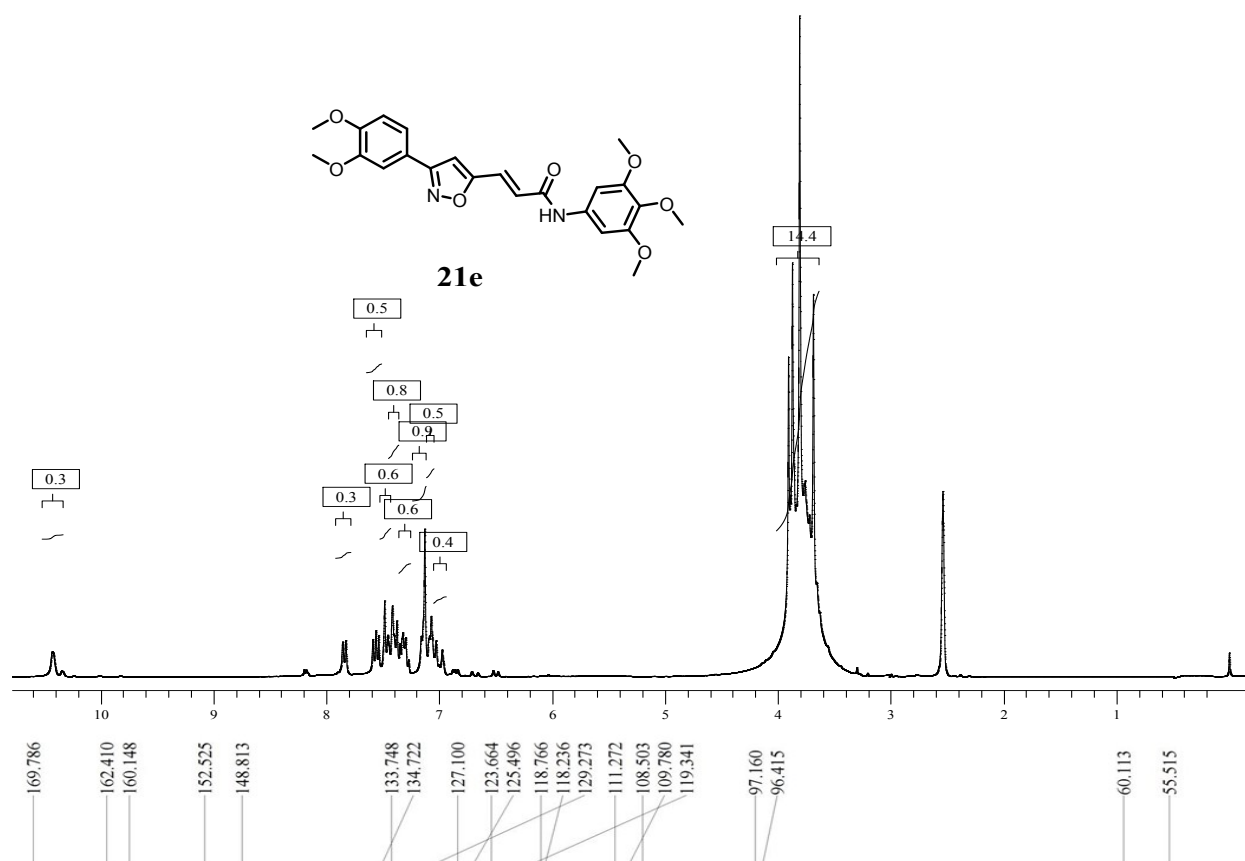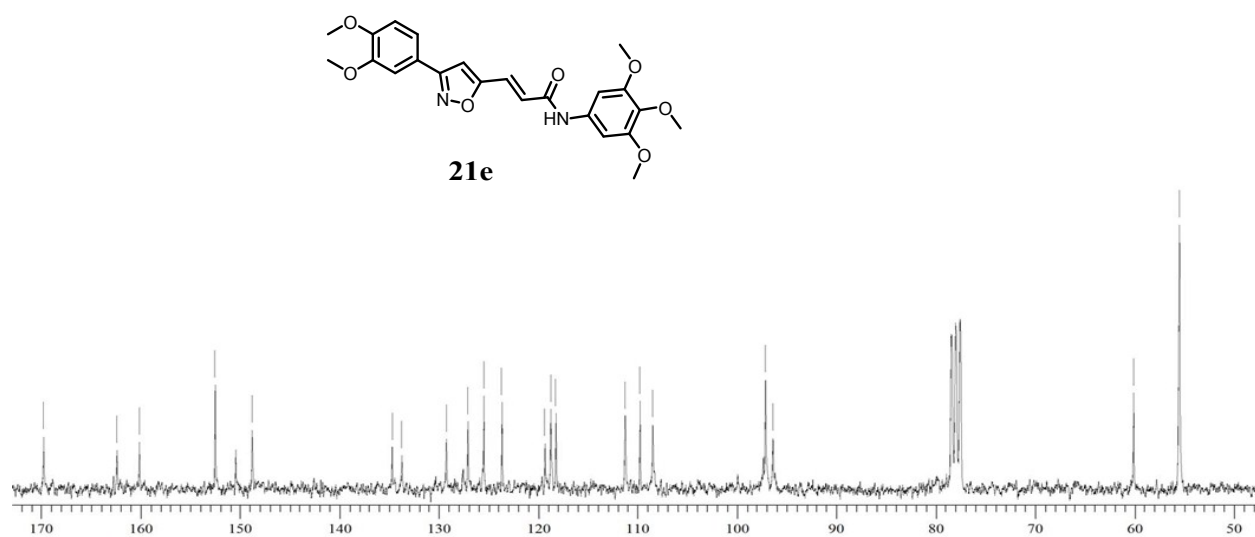

**$^1\text{H}$  NMR and  $^{13}\text{C}$  NMR spectra of conjugate 21f:**

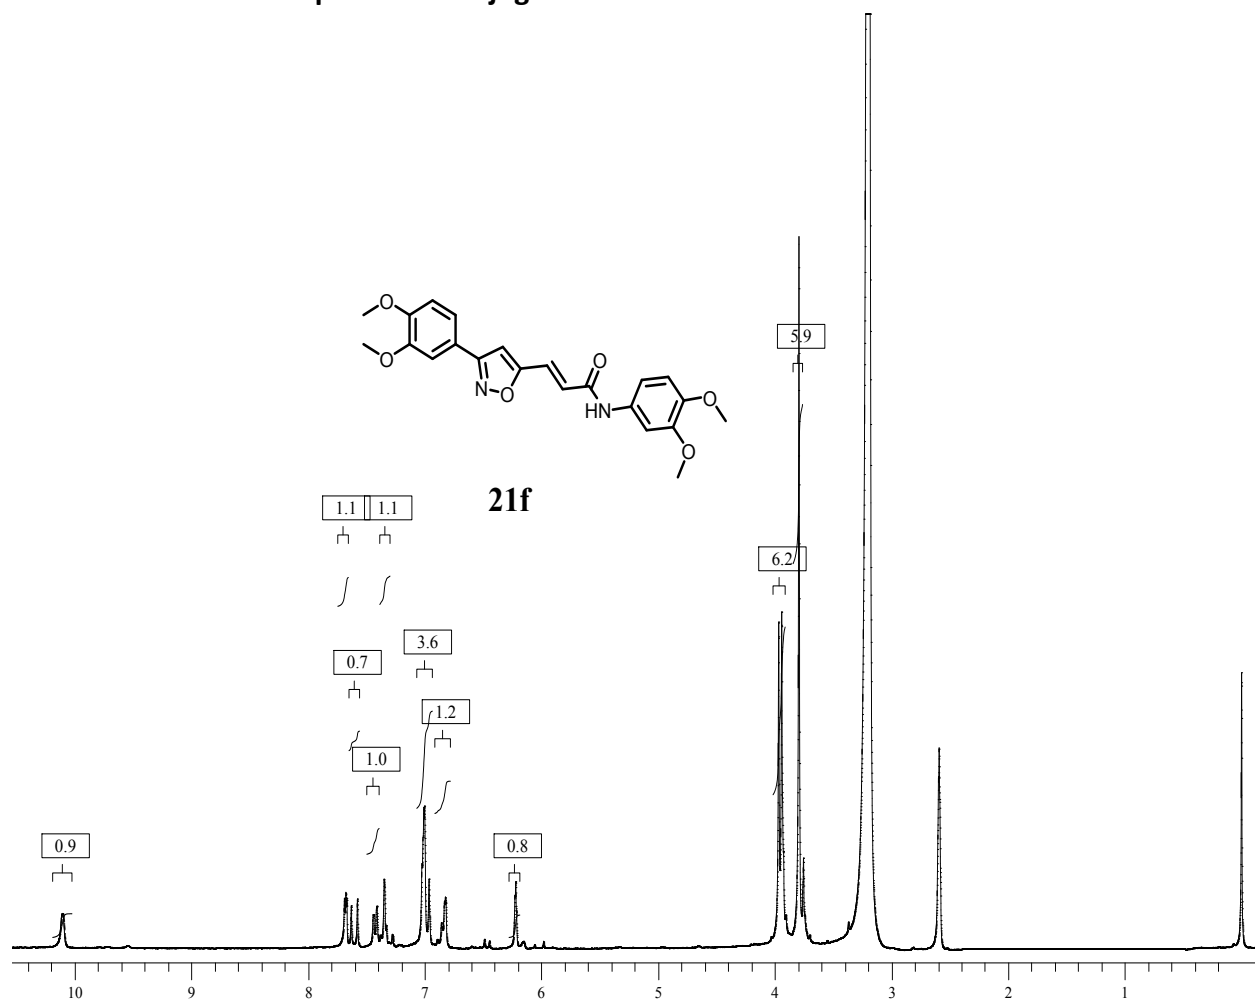

**<sup>1</sup>H NMR and <sup>13</sup>C NMR spectra of conjugate 21g:**

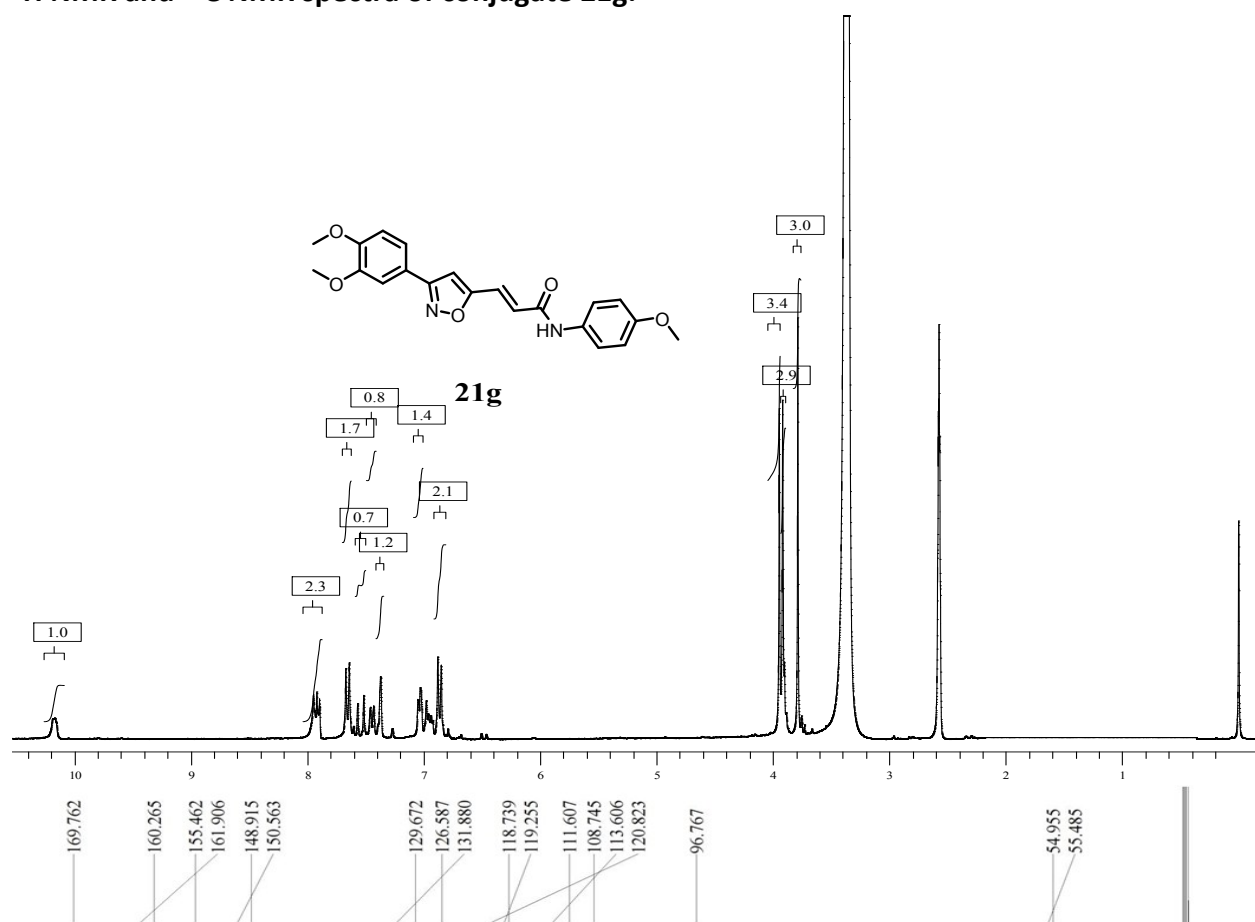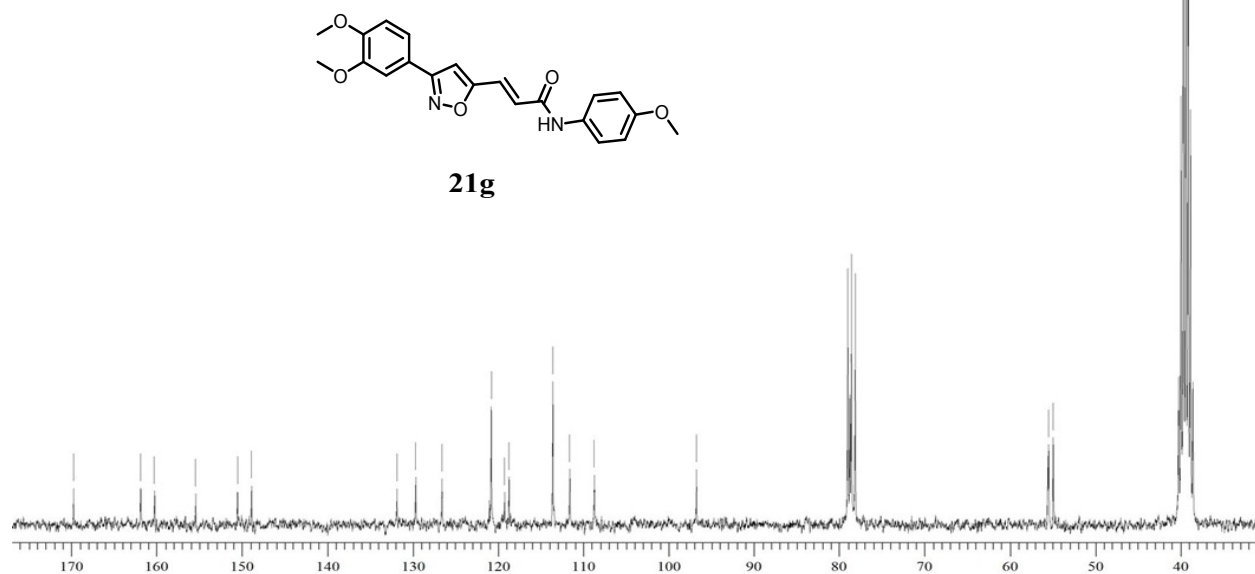

**<sup>1</sup>H NMR Spectrum of conjugate 21h:**

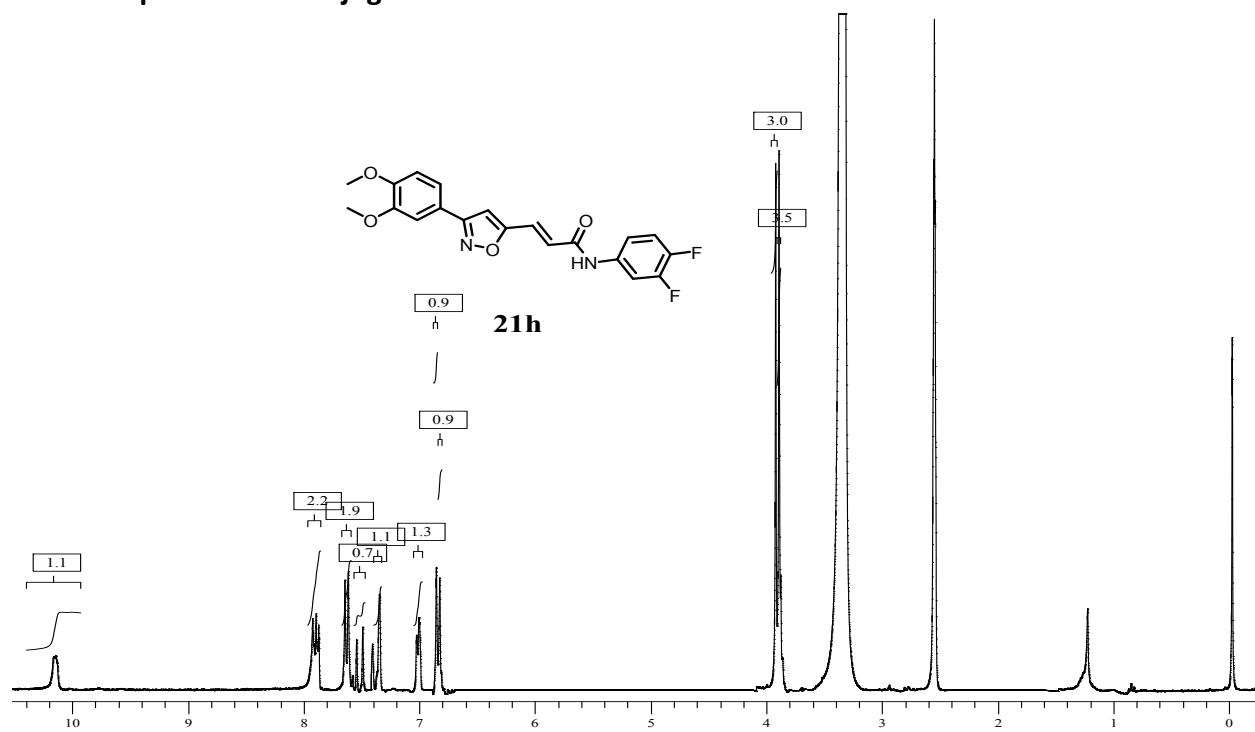



**<sup>1</sup>H NMR and <sup>13</sup>C NMR spectra of conjugate 21i:**

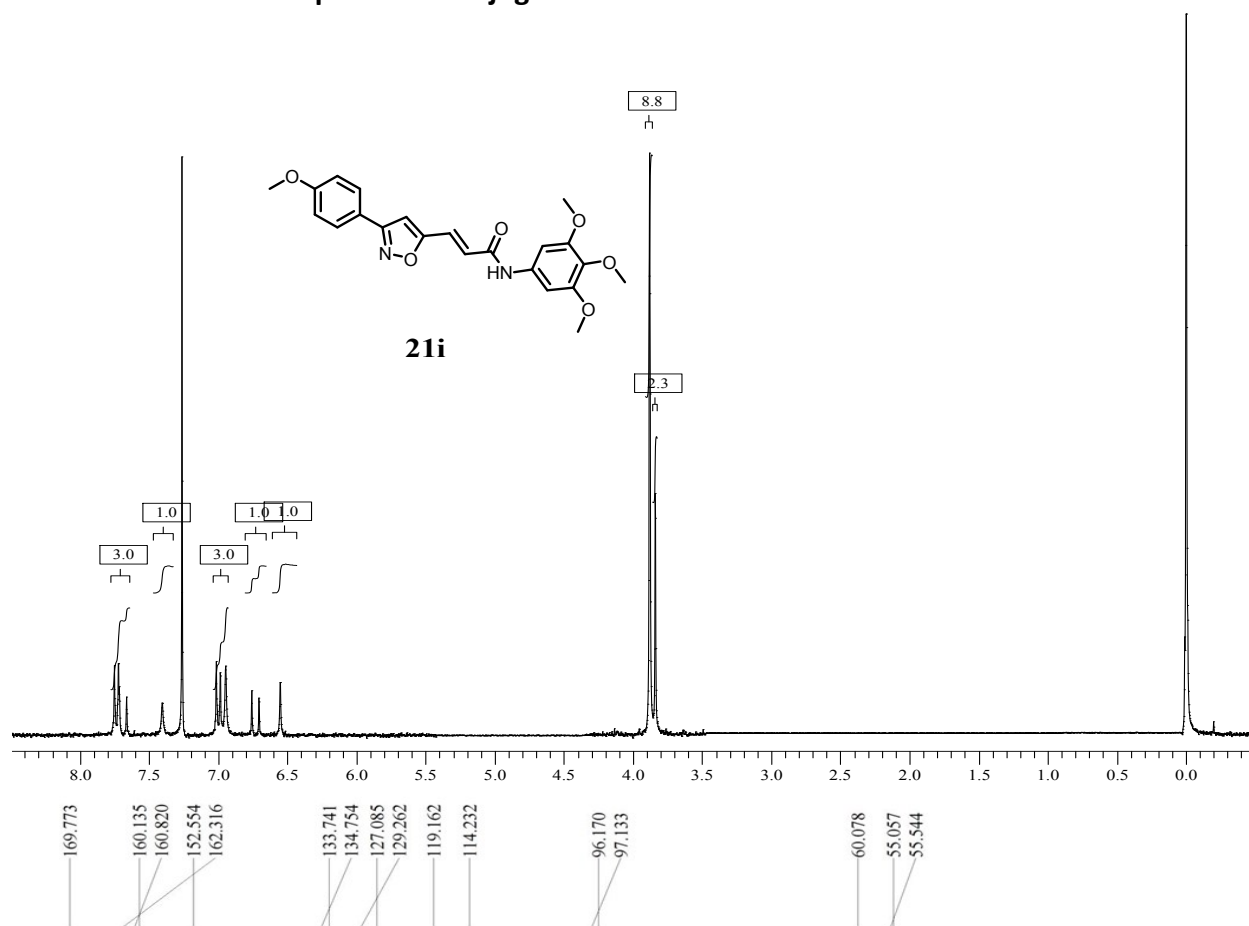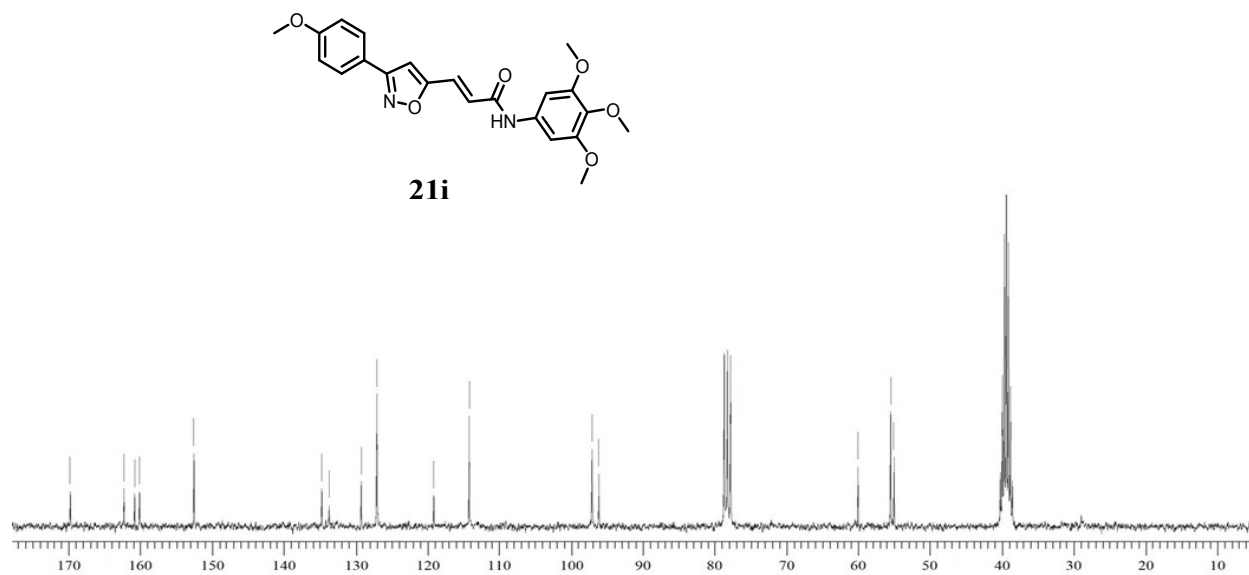

**<sup>1</sup>H NMR and <sup>13</sup>C NMR spectra of conjugate 21j:**

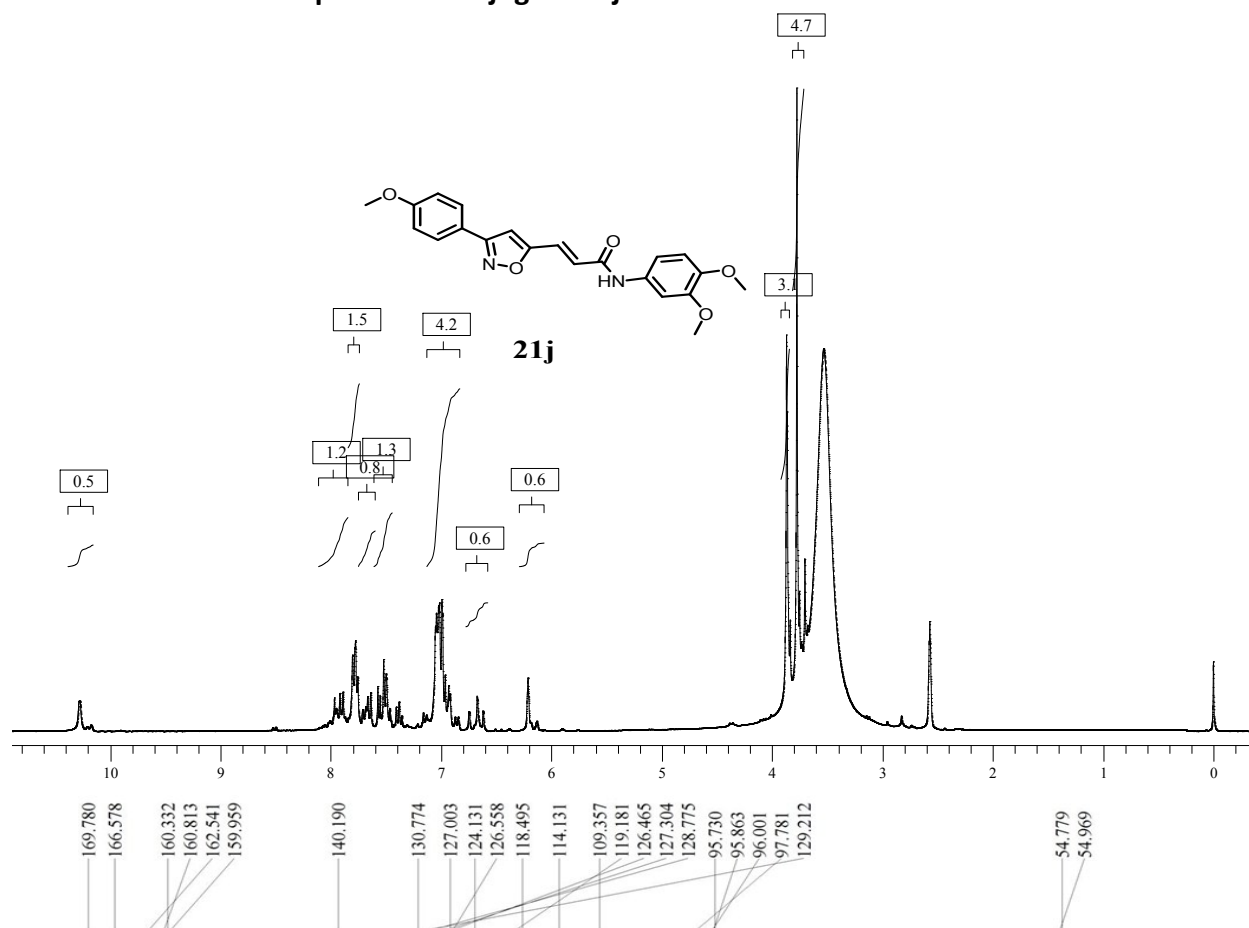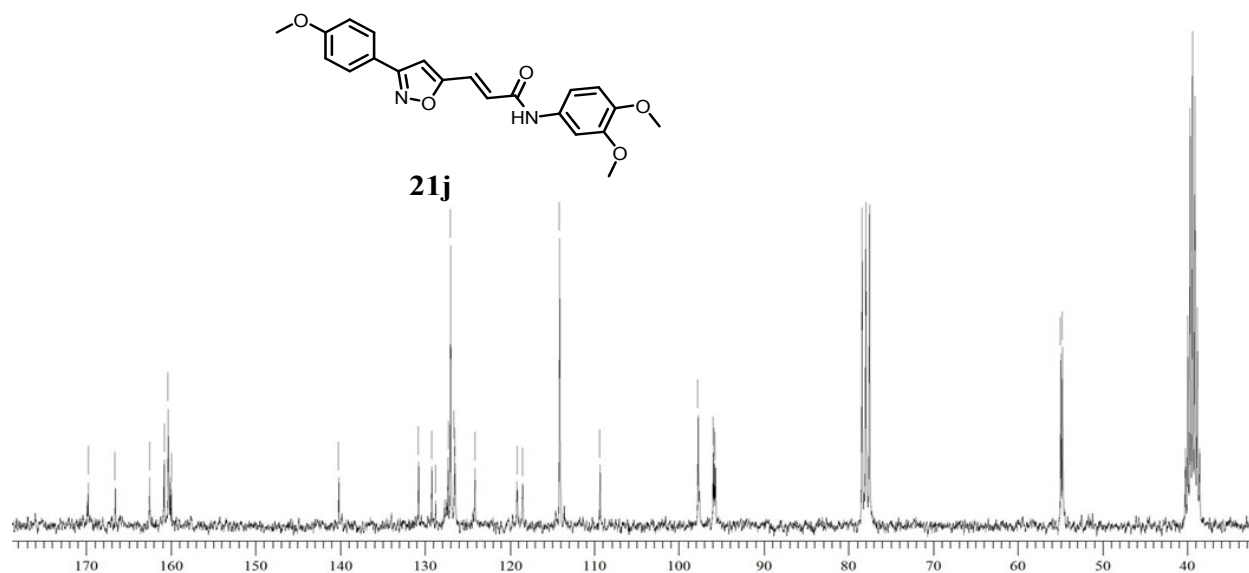

**<sup>1</sup>H NMR and <sup>13</sup>C NMR spectra of conjugate 21k:**

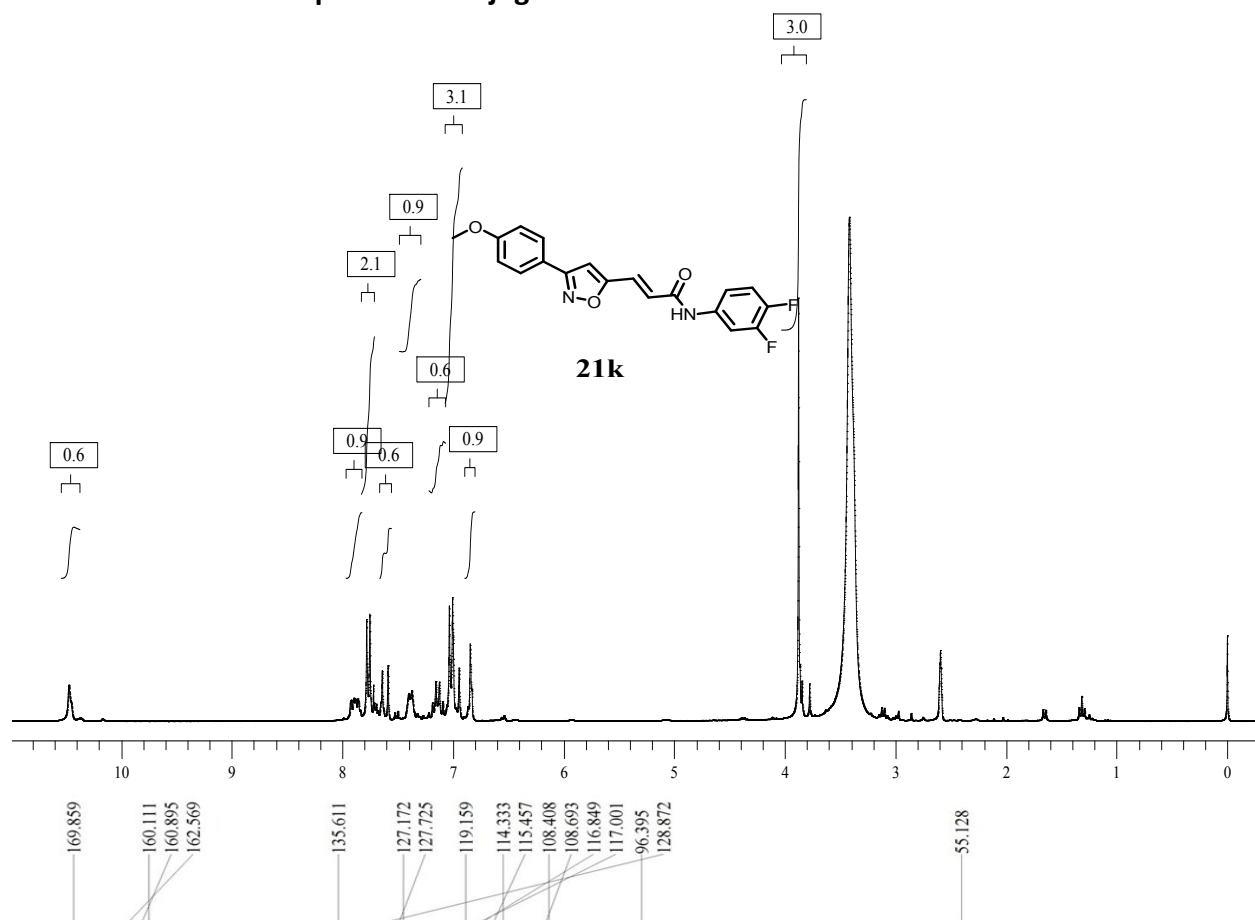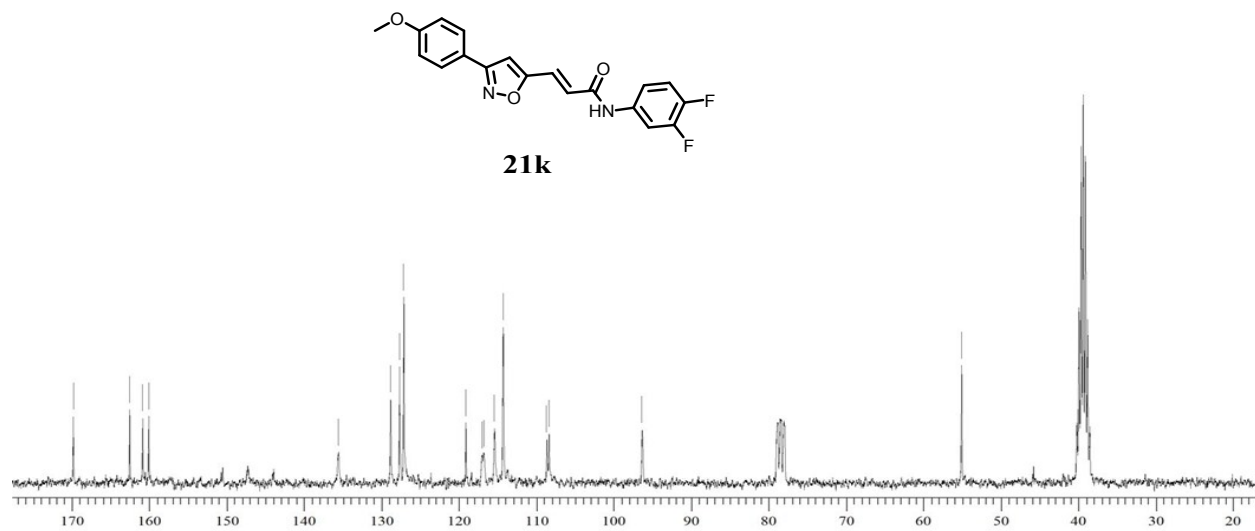

**<sup>1</sup>H NMR Spectrum of conjugate 211:**

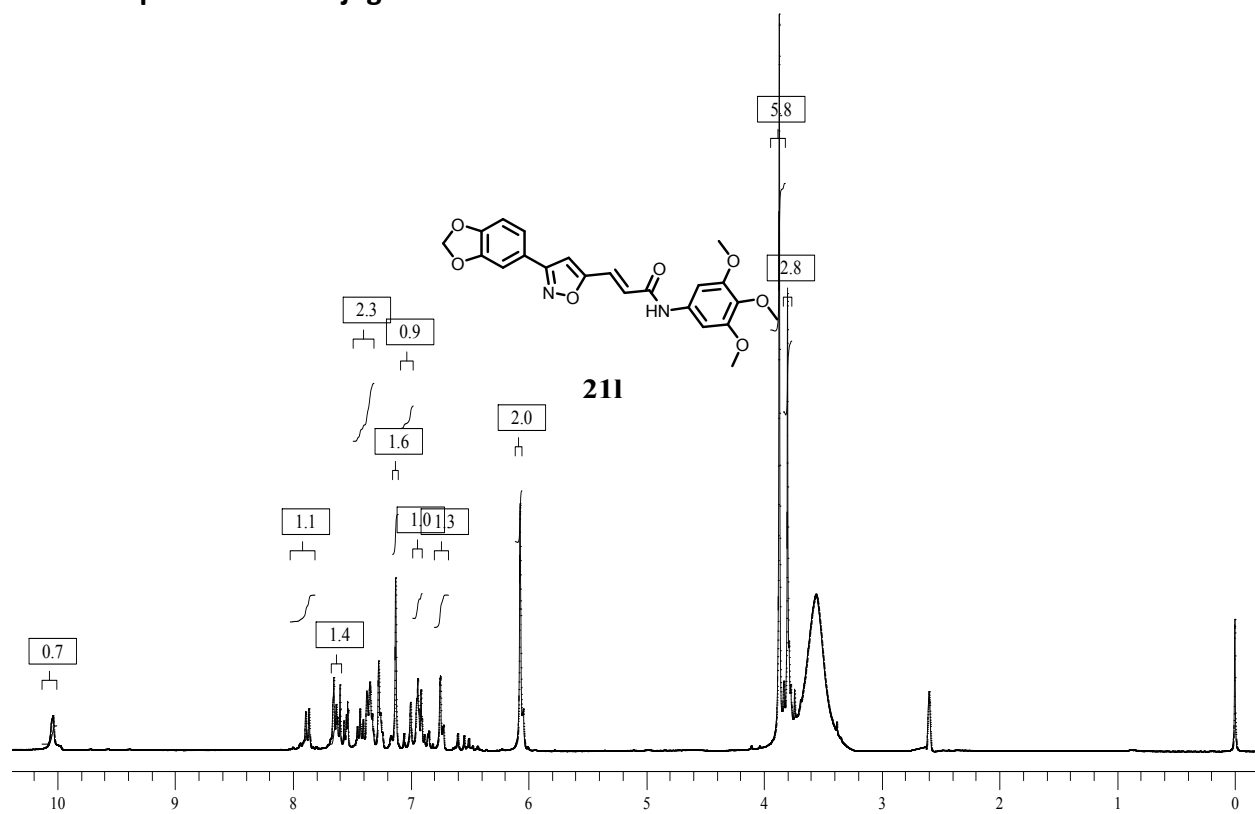

**<sup>1</sup>H NMR and <sup>13</sup>C NMR spectra of conjugate 21m:**

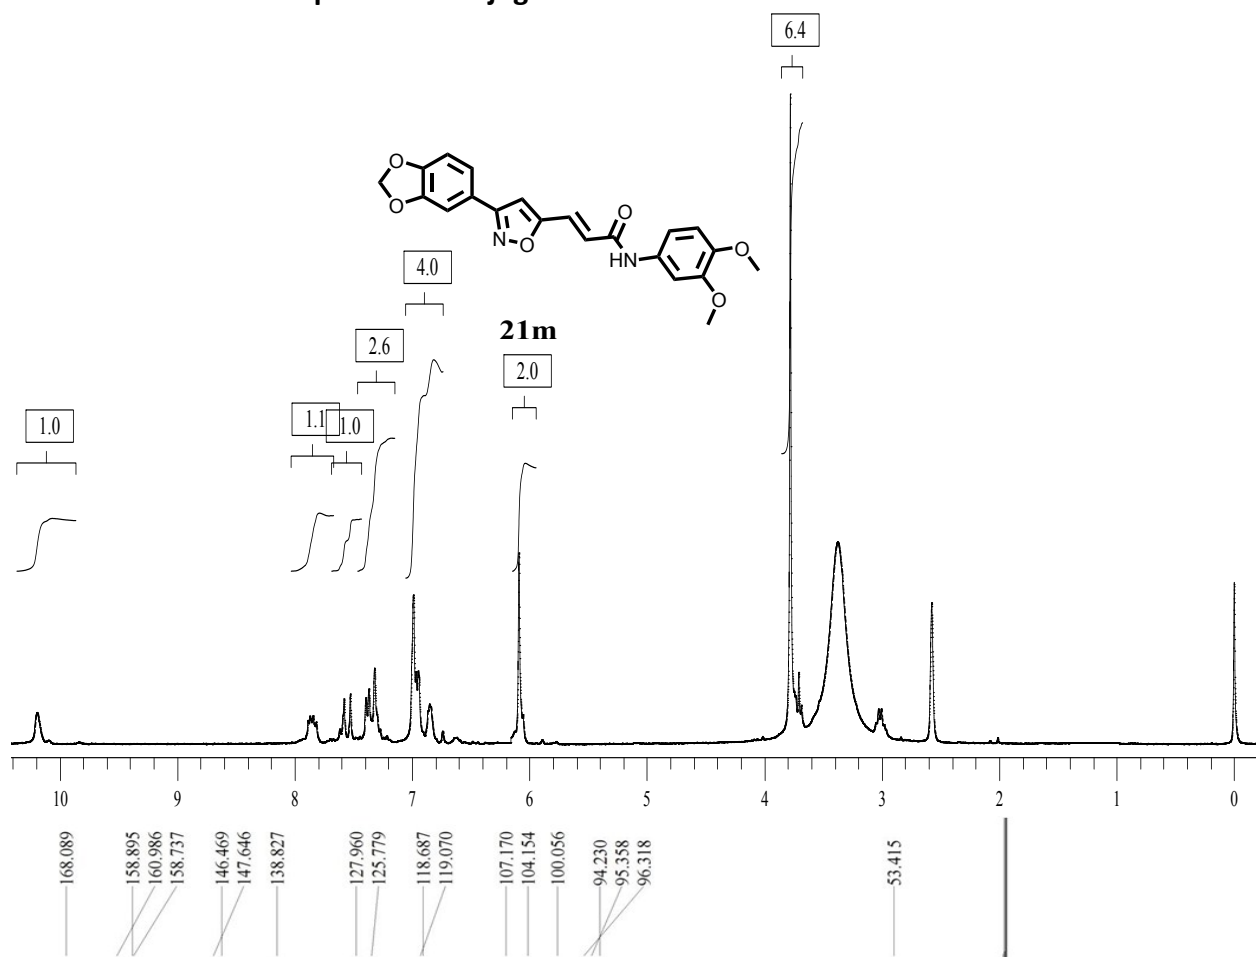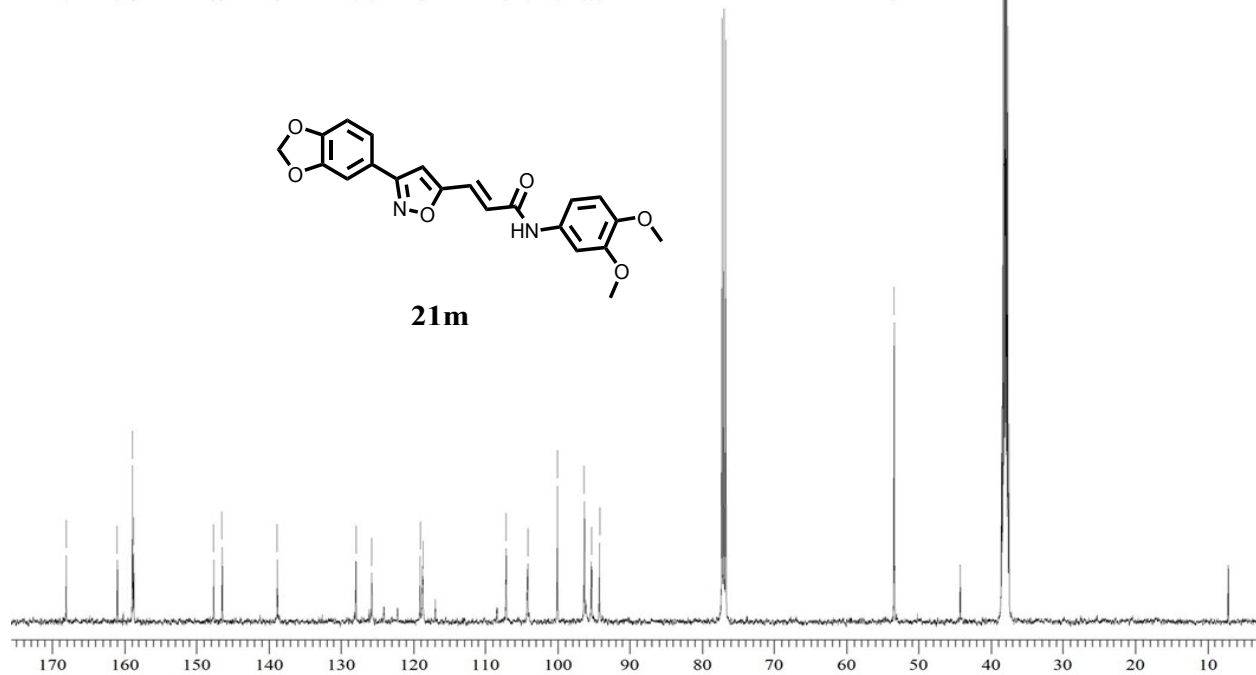

**<sup>1</sup>H NMR and <sup>13</sup>C NMR spectra of conjugate 21n:**

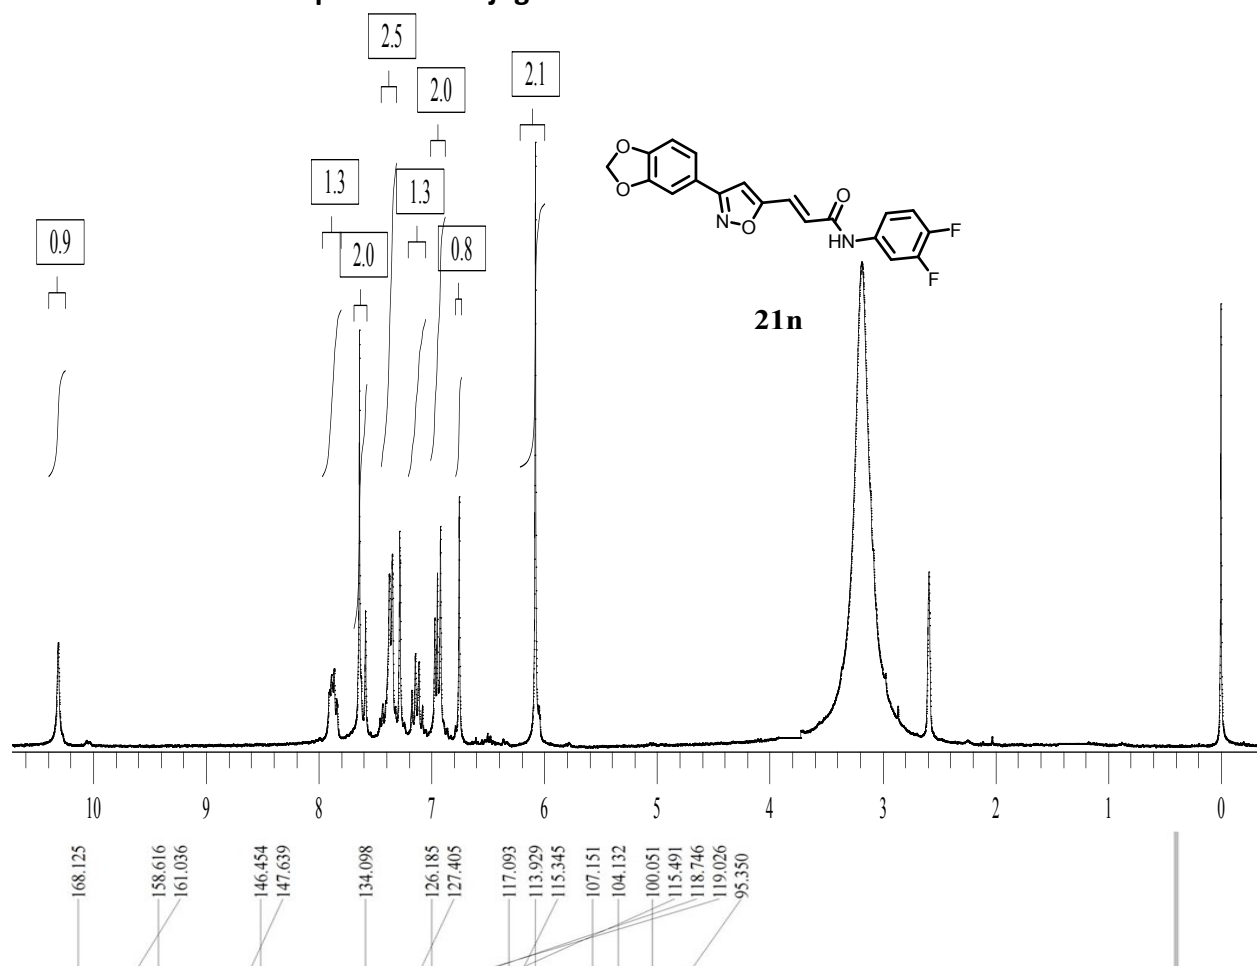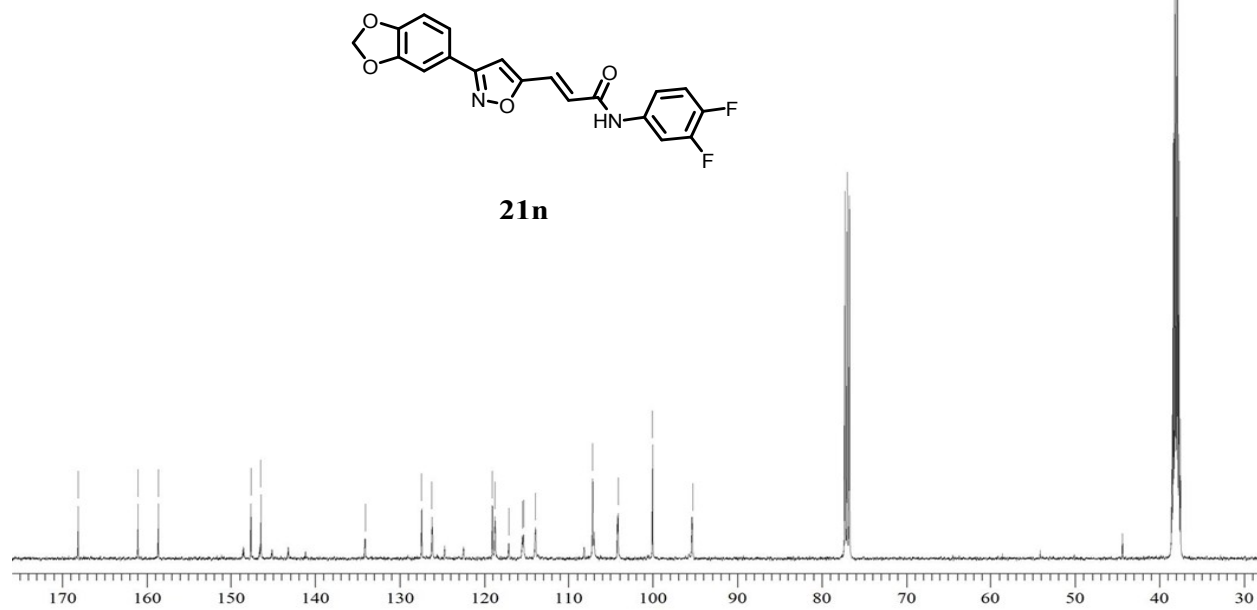

Supplement: c5ob01257k1.pdf [file c5ob01257k1.pdf]
